# Supplementary material for: Tissue Specific Diurnal Rhythms of Metabolites and Their Regulation during Herbivore Attack in a Native Tobacco, Nicotiana attenuata
Source: PLoS One. 2011 Oct 18;6(10):e26214. doi: 10.1371/journal.pone.0026214 (PMC3196511; doi:10.1371/journal.pone.0026214)
Supplement: File S1 — Complete list and expression value of oscillating metabolites and its related transcripts. (XLSX) [file pone.0026214.s010.xlsx]

## Sheet: Oscillating metabolites in leaf
						Control_Average value of each time point												W+OS_Average value of each time point						W+W_Average value of each time point
mz	mzmin	mzmax	rt	rtmin	rtmax	2 pm	6 pm	10 pm	2 am	6 am	10 am	2 pm	6 pm	10 pm	2 am	6 am	10 am	2 pm	6 pm	10 pm	2 am	6 am	10 am	2 pm	6 pm	10 pm	2 am	6 am	10 am
105.021	105.017	105.026	89.1031	85.4441	92.149	1.21104	1.23268	1.23311	0.499947	0.623361	1.18944	0.974806	1.03375	1.12131	0.547145	0.559954	0.80477	0.857974	0.662396	0.788806	0.692319	0.411087	0.598215	0.797378	0.697942	0.78124	0.528549	0.346929	0.561631
111.01	111.004	111.015	97.892	95.3543	106.263	1.04615	0.713637	1.09815	2.43408	2.98632	2.69805	1.24446	0.750726	0.673199	2.05583	1.97416	1.34809	1.18975	0.7479	0.593447	1.70415	1.93564	1.31518	1.17132	0.761992	0.699603	1.20446	1.69011	1.47757
111.012	111.009	111.018	129.375	124.771	160.185	1.47121	1.08549	1.70131	3.83065	4.23795	3.31259	1.64635	1.25429	1.03929	3.28994	2.66038	1.95925	1.76676	1.08725	1.07972	2.60251	3.34984	2.28761	2.03828	1.22924	1.0688	2.35939	2.57627	2.27015
112.988	112.985	112.992	562.314	547.597	578.938	1.02277	1.24611	1.29331	1.87125	1.63107	1.44831	1.20857	1.27556	1.26777	1.84331	1.22728	1.47163	1.16748	0.977054	1.31605	0.983809	1.07905	1.05404	1.26368	1.27079	1.14917	1.29953	1.32588	1.12759
115.043	115.036	115.049	237.378	235.248	240.062	0.292359	0.20277	0.195554	0.110798	0.157935	0.2374	0.381809	0.222555	0.193945	0.186727	0.161227	0.233468	0.216739	0.199752	0.185422	0.207613	0.201641	0.190981	0.237843	0.158436	0.195834	0.172986	0.210773	0.178891
128.037	128.035	128.042	132.484	129.384	154.956	0.236804	0.188043	0.244727	0.0165075	0.00657539	0.121789	0.176561	0.404327	0.196661	0.0241109	0.0364006	0.093568	0.283013	0.561684	0.0775111	0.0505734	0.016729	0.122133	0.257781	0.239613	0.132421	0.0389805	0.00531835	0.0471672
129.022	129.019	129.026	129.316	124.268	150.134	1.09292	0.449996	1.03126	2.4875	2.34394	2.0862	1.12263	0.733545	0.612844	2.02112	1.64046	1.27825	1.17531	0.791957	0.792968	1.68414	2.02487	1.51227	1.39167	0.76506	0.753397	1.39248	1.52337	1.41257
129.022	129.019	129.026	98.0206	93.2199	105.907	0.583477	0.525556	0.768427	1.43847	1.61305	1.76088	0.951938	0.642904	0.556363	1.27406	1.22751	0.984616	0.900385	0.601716	0.491074	1.01389	1.10483	0.933748	0.92718	0.686523	0.503598	0.807186	0.949166	0.941243
129.057	129.055	129.06	259.29	257.684	261.664	0.104073	0.105922	0.0721666	0.00639179	0.035313	0.0214239	0.0470323	0.212448	0.0595016	0	0.050567	0.0552905	0.196813	0.220618	0.120098	0.0804817	0.113604	0.100126	0.0661516	0.155873	0.120704	0.0549269	0.131144	0.00850073
143	142.995	143.003	136.103	132.184	151.055	0.214049	0.158629	0.120039	0.0361215	0.0353141	0.217985	0.145106	0.209749	0.234764	0.0687872	0.023199	0.15271	0.165328	0.103903	0.0423963	0.0524005	0.0320707	0.0598266	0.205512	0.0676135	0.0449789	0.0132738	0	0.0381168
145.063	145.047	145.07	86.4978	78.7487	104.661	2.19978	2.54764	1.61636	0.948638	0.33211	1.89638	2.40588	3.25269	1.35306	0.750833	0.269067	1.53569	2.2387	3.14846	1.20348	0.765023	0.579171	0.977895	2.88195	2.81136	1.47824	0.880054	0.452598	0.684885
146.963	146.957	146.968	75.2525	64.4165	106.979	12.5824	15.2518	18.5096	18.504	16.5166	17.3007	10.193	14.7636	13.8431	14.4366	12.8577	13.8378	13.7662	14.4812	12.0659	10.9791	11.5951	11.3177	15.7517	16.2772	14.2351	17.0018	13.4602	15.6346
147.031	147.028	147.036	129.302	121.516	135.906	0.675315	0.318104	0.53618	1.36141	1.32682	0.870923	0.625631	0.469125	0.25787	0.75986	0.806081	0.763124	0.628475	0.416348	0.408756	0.839927	0.857497	0.927658	0.778093	0.440304	0.455254	0.815493	0.836573	0.817534
150.043	150.039	150.048	166.836	162.822	179.765	0.269649	0.434927	0.327247	0.183519	0.219115	0.281992	0.369417	0.394496	0.309383	0.160095	0.218302	0.268402	0.364888	0.379389	0.598438	0.396013	0.381103	0.544762	0.33047	0.357016	0.408492	0.397279	0.274673	0.274135
153.021	153.017	153.025	274.265	271.668	277.241	0.491989	0.612059	0.885885	0.470886	0.482295	0.388778	0.444901	0.489634	0.999823	1.07919	0.419457	0.290576	0.889058	1.6194	1.04482	0.748729	0.535738	0.285589	0.495171	0.522948	0.594646	0.312192	0.355081	0.3961
154.999	154.995	155.002	129.301	126.586	138.238	0.138257	0.0391523	0.162849	0.331498	0.276004	0.229509	0.137476	0.0833881	0.0756106	0.168937	0.238341	0.176432	0.183535	0.0933937	0.0950185	0.23701	0.262226	0.223561	0.250235	0.0720136	0.11181	0.14966	0.190797	0.207001
164.072	164.071	164.074	192.458	190.157	199.562	9.64605	8.64742	8.82783	5.51969	5.01273	7.43635	8.11123	8.50612	7.09317	5.51901	6.34118	6.02569	11.551	23.6541	14.836	9.09047	7.25098	7.68456	10.3533	21.121	13.8113	7.88676	6.54898	6.54829
173.01	173.006	173.017	97.7188	92.4958	102.859	0.45018	0.359743	0.463324	0.580107	0.697748	0.731895	0.449521	0.345876	0.336029	0.609733	0.491426	0.443405	0.34779	0.323194	0.23484	0.493982	0.453694	0.422766	0.518559	0.320889	0.289573	0.373171	0.536961	0.329056
174.017	174.013	174.022	260.667	256.376	264.506	0.278523	0.398592	0.32459	0.147258	0.224933	0.385268	0.338284	0.316704	0.303459	0.255935	0.184828	0.354848	0.437385	0.27555	0.222467	0.165705	0.189136	0.195302	0.389158	0.321156	0.225891	0.124705	0.102116	0.0985094
175.061	175.052	175.066	236.777	229.787	240.716	0.826995	0.612725	0.580884	0.211741	0.229501	1.2202	1.25618	0.69723	0.245354	0.152375	0.17397	0.722595	0.418439	0.240743	0.177304	0.161977	0.146417	0.586489	0.893022	0.291877	0.23126	0.11187	0.169632	0.464132
180.067	180.064	180.07	143.393	137.835	164.224	1.44392	1.5345	2.02224	0.9756	1.12309	1.0386	1.24715	1.76476	2.07233	1.24182	1.60419	0.978542	2.37658	4.36372	4.06742	3.30955	2.71682	1.90979	1.56227	2.76693	3.08999	2.80526	2.5549	1.35735
184.001	183.996	184.006	84.6959	82.0002	90.1319	0.613885	0.470898	0.562055	0.883202	0.913017	0.610673	0.495431	0.360653	0.665598	0.876823	0.944666	0.53411	1.04666	0.603662	0.566357	0.69685	0.806315	0.427042	0.747919	0.480739	0.699866	0.709078	0.754134	0.43427
188.056	188.052	188.061	138.035	135.014	160.77	0.260406	0.204977	0.164556	0.00840751	0.00323677	0.367428	0.29941	0.235296	0.0653581	0	0.0031354	0.20016	0.312845	0.0483814	0	0	0.013506	0.424814	0.340157	0.214665	0.023253	0	0	0.0380407
191.02	191.019	191.05	129.346	118.779	139.592	19.1025	10.4811	16.1341	37.2129	33.9906	21.6031	18.702	14.3252	10.4265	20.2277	24.9918	21.6766	19.4927	13.2737	14.2182	26.813	31.6369	24.2441	21.8553	14.2013	13.525	24.2654	25.485	23.2799
191.049	191.02	191.057	97.9897	87.2271	118.488	8.71426	4.5997	10.3338	23.4856	26.8394	23.6645	10.7317	7.37023	3.84607	17.7155	16.9074	10.168	10.2757	5.65601	4.0872	14.5482	16.9009	13.2614	11.0043	5.61764	4.72398	11.0509	17.0024	13.5668
192.054	192.022	192.061	97.1976	83.206	113.51	0.510029	0.430101	0.587656	1.51155	1.66042	1.62376	0.602836	0.499077	0.258556	1.11225	0.950766	0.647868	0.659332	0.353384	0.333931	0.975109	1.10207	0.769613	0.717339	0.789811	0.323339	0.693843	1.1453	0.932664
193.043	193.024	193.064	97.3799	83.9338	105.476	0.248709	0.254852	0.220137	0.400491	0.505013	0.372103	0.281044	0.211829	0.205709	0.41302	0.327354	0.294916	0.201603	0.208613	0.196804	0.233168	0.315471	0.267566	0.388993	0.274589	0.198093	0.277262	0.368408	0.308749
195.066	195.063	195.069	250.846	248.871	252.175	0.0934065	0.0817181	0.12125	0.088982	0.0819632	0.0920509	0.0991822	0.0682328	0.135998	0.103219	0.0676169	0.0818881	0.158247	0.152867	0.237859	0.185649	0.29935	0.435112	0.065507	0.0483187	0.122368	0.0793884	0.129217	0.244301
200.055	200.051	200.06	137.119	133.661	160.69	0.302097	0.229874	0.28727	0.130057	0.134698	0.209245	0.276604	0.325283	0.262553	0.171196	0.140153	0.237633	0.274195	0.431694	0.365716	0.273128	0.223448	0.377519	0.296464	0.165366	0.183165	0.160867	0.153416	0.206721
205.969	205.965	205.974	88.9749	85.9136	91.481	1.20644	1.39951	1.3632	1.02442	0.778315	1.36721	1.37514	1.20216	0.970763	1.01302	0.562184	0.816807	0.716806	0.699591	0.792274	0.55198	0.546997	0.847023	1.07744	0.954163	0.915697	0.836776	0.799963	1.06643
209.117	209.113	209.12	316.751	315.388	318.906	0.525872	0.518266	0.589992	0.411812	0.394883	0.493556	0.682317	0.568882	0.401765	0.320808	0.26612	0.264187	0.987815	1.0436	1.49486	1.21379	0.916791	1.144	0.623266	0.7146	0.665427	0.630395	0.46632	0.736307
218.992	218.984	218.998	86.1369	82.6461	91.1394	0.26689	0.321996	0.124613	0.0490799	0.0205839	0.176516	0.319473	0.322602	0.201746	0.054887	0.0560691	0.175709	0.321536	0.413337	0.160096	0.150731	0.0762776	0.112613	0.380617	0.251795	0.141367	0.0729034	0.0271183	0.0327019
227.128	227.124	227.132	316.749	315.423	318.192	1.89979	2.12343	1.99143	1.67173	1.68199	1.87336	2.32545	2.2418	1.63416	1.55568	1.42549	1.24621	3.57423	3.75483	5.08265	4.00923	3.09276	4.12871	2.37591	2.77213	2.46513	2.2614	1.88588	2.77144
229.02	229.013	229.026	83.1773	79.252	88.8484	0.388977	0.692999	0.297142	0.216217	0.0549198	0.468757	0.85504	0.746808	0.406422	0.156321	0.118324	0.310118	0.683663	0.855556	0.366251	0.269844	0.0549517	0.22255	0.840816	0.67558	0.434321	0.177335	0.0250961	0.123476
239.127	239.123	239.131	376.137	372.51	376.856	0.193788	0.284543	0.233766	0.09588	0.155942	0.11827	0.205875	0.182551	0.162448	0.109493	0.100666	0.0540185	0.358556	0.398021	0.546048	0.416401	0.320489	0.486604	0.170545	0.239737	0.183116	0.135405	0.0874309	0.210283
243.061	243.058	243.068	136.822	129.8	167.049	2.4885	2.44981	2.22404	1.65945	1.59194	2.0874	2.28178	2.64842	2.23278	1.80299	1.53035	2.08218	2.52433	3.16171	2.67758	2.10762	1.90148	2.75894	2.23286	2.18529	2.1918	1.56096	1.54516	1.95516
245.04	245.024	245.046	99.6082	80.713	112.318	0.987298	1.27087	1.3411	0.908798	0.843925	0.779007	0.93455	1.42612	1.29097	0.956708	0.909239	0.938876	0.749585	1.22314	0.997799	1.0437	1.21574	0.831696	0.763406	1.34294	1.20041	1.09201	1.03231	1.06585
246.012	246.006	246.017	88.1045	84.8446	89.9467	0.210977	0.31628	0.264614	0.13811	0.00290596	0.216547	0.292003	0.461369	0.0467274	0.0205479	0.00707544	0.0463634	0.279551	0.383468	0.090453	0.0194795	0.00429355	0.058192	0.367517	0.435108	0.146581	0.0243018	0	0.0443811
263.127	263.119	263.131	328.58	327.965	329.366	0.070567	0.124954	0.135686	0.0496883	0.0654131	0.0611242	0.051493	0.0738661	0.144782	0.0396506	0.0610811	0.0731795	0.169415	0.0583179	0.112031	0.0800067	0.0726377	0.0810026	0.120999	0.143366	0.152297	0.166665	0.152473	0.0780476
267.073	267.067	267.078	166.355	162.975	171.587	0.275048	0.395609	0.381915	0.011909	0.00288495	0.193635	0.330882	0.574351	0.250686	0	0	0.174368	0.425827	0.963262	0.648612	0.0440417	0.00197876	0.310246	0.862021	0.628121	0.36117	0	0.0104934	0.11862
274.024	274.022	274.031	123.757	114.189	136.212	1.1006	0.54535	0.108646	1.20894	0.989062	0.793397	0.852378	0.672421	0.399049	0.601532	0.796824	1.22583	0.594712	0.855842	1.05332	0.838269	1.08089	0.689278	0.283027	0.523125	0.496212	0.856119	0.795195	1.13266
277.123	277.119	277.127	244.743	243.344	246.024	0.35988	0.358918	0.216403	0.155682	0.217322	0.420758	0.404253	0.30907	0.242185	0.206566	0.295848	0.358372	0.301432	0.409031	0.244852	0.210365	0.237552	0.382619	0.324988	0.362847	0.30416	0.200704	0.240015	0.356433
282.083	282.082	282.085	167.106	163.442	182.725	6.32474	6.70858	6.98193	5.26108	4.94745	5.76767	6.89932	6.5525	5.91728	4.40714	4.57487	5.61172	7.50075	7.58639	9.07191	7.049	5.88091	8.36222	6.90481	6.37693	6.79876	6.56243	5.10613	5.841
282.875	282.871	282.881	76.7519	75.7203	77.7382	0.424547	0.374386	0.43157	0.305045	0.378167	0.402854	0.4115	0.411392	0.403349	0.295848	0.380399	0.420588	0.455572	0.383925	0.33847	0.410442	0.354913	0.401103	0.305727	0.316082	0.417199	0.433598	0.57715	0.632635
294.892	294.88	294.897	77.6243	74.919	85.6299	2.46044	2.47834	2.85647	2.26181	2.67095	2.6617	3.05038	2.66359	2.5486	1.87206	2.25462	2.61619	3.01303	2.56269	2.17751	2.16317	2.51065	2.88537	2.53352	1.98387	2.47202	2.33455	2.66087	3.48439
295.226	295.216	295.23	522.352	519.486	526.965	0.739306	0.673208	0.65492	0.548604	0.52766	0.509118	0.594477	0.614909	0.483093	0.40561	0.376115	0.3009	0.929394	1.41782	1.46461	1.02513	1.08432	1.49384	0.503511	0.678768	0.745191	0.666223	0.623006	0.919827
306.076	306.073	306.081	233.682	226.712	235.554	0.524579	0.357579	0.337995	0.367944	0.144848	0.260194	0.419506	0.501203	0.319838	0.332113	0.219261	0.117531	1.02002	0.737141	0.383665	0.340798	0.231969	0.333446	0.800491	0.571347	0.328562	0.18243	0.183324	0.187566
307.191	307.186	307.196	470.279	457.864	471.337	0.427476	0.485934	0.407442	0.270503	0.291195	0.293067	0.481638	0.37734	0.276746	0.211336	0.243183	0.0936817	0.584803	0.922481	0.954464	0.877864	0.632353	1.01421	0.327021	0.553763	0.512088	0.40017	0.474555	0.567391
310.969	310.961	310.975	98.3812	96.7839	105.094	0.168174	0.0890781	0.187397	0.325617	0.338017	0.319387	0.182026	0.203117	0.083098	0.303973	0.240637	0.221697	0.119227	0.110539	0.0712032	0.198457	0.283132	0.232231	0.137382	0.120528	0.0987351	0.220832	0.251636	0.230682
313.12	313.115	313.128	291.128	275.457	291.837	0.119674	0.15473	0.181314	0.146873	0.148236	0.149348	0.153596	0.130493	0.175578	0.137534	0.136713	0.125335	0.165666	0.417671	0.815979	0.780391	0.78688	0.930877	0.141696	0.223558	0.394485	0.460499	0.466233	0.465076
313.872	313.868	313.878	86.363	84.5658	88.3166	0.303803	0.30736	0.301752	0.364411	0.28694	0.251636	0.337983	0.338402	0.24328	0.310832	0.201425	0.183357	0.234371	0.205163	0.224755	0.188907	0.193411	0.245708	0.340595	0.286581	0.257299	0.28788	0.279673	0.294991
326.942	326.939	326.949	130.317	128.223	138.238	0.215111	0.0784334	0.151544	0.420132	0.364946	0.234766	0.187376	0.117225	0.0677815	0.241705	0.315078	0.276099	0.30245	0.152135	0.14498	0.370212	0.467556	0.371359	0.229479	0.0890888	0.141416	0.308087	0.316766	0.333199
326.96	326.944	326.987	96.7858	87.9344	110.304	1.12728	0.641972	0.734055	2.43099	2.10329	1.93537	1.159	0.708928	0.676212	1.53846	1.7787	1.35731	0.94947	0.850045	0.730575	1.33529	1.54067	1.10737	1.0304	0.769417	0.826011	1.31459	1.48934	1.27279
328.045	328.041	328.053	129.094	124.771	158.163	0.0664197	0.165907	0.100929	0.00898525	0.0348536	0.108089	0.0834878	0.153951	0.0759449	0.0965963	0.0454817	0.0784261	0.166175	0.672976	0.581957	0.41265	0.309423	0.38856	0.141641	0.495505	0.382587	0.523521	0.318451	0.22778
343.211	343.208	343.216	299.205	297.254	300.575	0.0205679	0.0364979	0.0373237	0	0.00965044	0.0244435	0.0656816	0.0590369	0.0389128	0.0115311	0.00289757	0	0.648104	0.513991	0.594201	0.404167	0.371427	0.505919	0.189848	0.23057	0.209405	0.103041	0.135758	0.205435
350.072	350.068	350.077	167.168	163.787	178.786	0.134654	0.241906	0.183959	0.0807178	0.0463513	0.119746	0.227295	0.163493	0.13205	0.0506169	0.0799636	0.0743067	0.126381	0.213288	0.264676	0.166486	0.0957944	0.269152	0.12636	0.103922	0.115024	0.114334	0.0945864	0.106239
351.132	351.123	351.136	192.606	190.449	200.067	0.449295	0.308029	0.29386	0.0878286	0.100904	0.203003	0.295067	0.312837	0.242124	0.0835263	0.166112	0.172994	0.533745	1.43563	0.893446	0.381492	0.278068	0.324109	0.488599	1.64829	0.800262	0.241118	0.178801	0.172087
359.125	359.119	359.136	186.954	184.681	192.836	0.225674	0.388062	0.457616	0.281447	0.280443	0.25852	0.287469	0.309339	0.404165	0.322715	0.323824	0.270271	0.374453	0.373489	0.322669	0.45669	0.363464	0.273712	0.297529	0.185785	0.192935	0.335603	0.419523	0.324818
361.159	361.149	361.168	490.527	481.58	491.656	0.305104	0.348895	0.354023	0.221187	0.2896	0.273107	0.309852	0.335437	0.292834	0.179826	0.315952	0.259443	0.44699	0.533116	0.598764	0.465349	0.458109	0.592666	0.238631	0.294495	0.367698	0.238906	0.273524	0.333772
363.001	362.994	363.036	96.62	90.8157	109.329	1.50685	1.18284	1.53507	2.70208	2.33752	2.21126	2.02115	1.25179	1.29988	2.08029	2.09496	1.51715	1.37735	1.26185	1.12097	1.73125	1.65137	1.41971	2.01201	1.183	1.47075	1.78404	2.32947	2.06106
364.909	364.898	364.934	97.343	91.5699	104.683	0.222061	0.171018	0.27952	0.541218	0.464113	0.406185	0.296492	0.297559	0.193258	0.402016	0.327539	0.258026	0.298013	0.239636	0.225068	0.262212	0.401688	0.277056	0.409076	0.217363	0.203854	0.39729	0.499597	0.369103
377.194	377.189	377.202	439.803	437.869	446.37	0.191601	0.231809	0.197523	0.078929	0.116524	0.136949	0.175041	0.22469	0.136425	0.0858141	0.0555775	0.0409253	0.462452	0.586597	0.672933	0.643087	0.440692	0.639075	0.224313	0.312741	0.352125	0.247364	0.203721	0.221226
379.161	379.158	379.164	222.635	218.73	224.788	0.619767	0.567922	0.331831	0.389679	0.523949	0.477376	0.463762	0.605489	0.341108	0.347978	0.505978	0.705515	0.162752	0.549421	0.425082	0.596059	0.414859	0.507953	0.216378	0.458179	0.53434	0.355512	0.460963	0.526458
387.161	387.156	387.165	289.179	287.502	295.268	0.0942099	0.0816845	0.068096	0.00942877	0.0265098	0.0637336	0.0789662	0.0851942	0.0958219	0.0566184	0.0550492	0.0100253	0.181867	0.199375	0.253819	0.301034	0.282875	0.27444	0.063516	0.0865378	0.174173	0.182617	0.173713	0.195644
389.127	389.093	389.143	261.849	257.691	266.321	0.569538	0.550501	0.612849	0.528358	0.458579	0.511979	0.646796	0.598735	0.505489	0.422792	0.513985	0.42871	0.446886	0.387385	0.280468	0.338258	0.289838	0.300933	0.483068	0.48749	0.486081	0.530666	0.458953	0.513476
389.201	389.194	389.206	190.529	189.197	199.562	0.0651077	0.147946	0.0979162	0.0426402	0.0642513	0.0707449	0.0967487	0.122089	0.104076	0.0289775	0.0705403	0.0480011	0.0961439	0.122209	0.122796	0.0723617	0.0628166	0.126926	0.0302253	0.0330577	0.0659204	0.0379964	0.0326683	0.0610896
397.054	397.051	397.06	376.125	375.154	377.268	0.0694448	0.0720168	0.119769	0.157569	0.150512	0.17272	0.0578575	0.0947007	0.117962	0.168916	0.144529	0.146626	0.048439	0.0354512	0.00458331	0.060134	0.0699659	0.00957488	0.0526634	0.0537859	0.061182	0.11778	0.0711547	0
405.026	405.02	405.034	97.5054	96.3543	101.453	0.0303421	0.00853827	0.0323492	0.385674	0.420788	0.353055	0.0374319	0	0.002824	0.230237	0.309632	0.0892638	0.0470851	0	0	0.182247	0.179814	0.0403932	0.0621557	0	0.00541934	0.0996026	0.183204	0.120019
405.029	405.023	405.033	130.25	126.126	152.684	1.25464	0.696023	1.29701	3.64491	3.88395	4.75365	1.06049	0.815037	0.569889	4.07047	1.95631	1.50329	1.24516	0.577683	0.688974	2.57984	2.90537	1.91918	1.48846	0.714432	0.652728	1.76775	2.07622	1.48264
405.12	405.114	405.126	300.855	296.067	301.683	0.0792367	0.108871	0.169442	0.106237	0.0872703	0.0230315	0.0094973	0.0626327	0.224684	0.289893	0.0435781	0.061176	0.23909	1.89115	1.78932	1.08807	1.09015	0.834474	0.0138585	0.49926	0.687998	0.556052	0.700997	0.699524
405.174	405.166	405.184	257.372	253.969	289.883	0.243675	0.263103	0.32461	0.240325	0.191271	0.20649	0.275378	0.251292	0.31419	0.263787	0.22085	0.26645	0.442466	0.56683	0.598373	0.579294	0.5578	0.632285	0.30534	0.364073	0.418518	0.447389	0.47066	0.513871
410.864	410.856	410.867	79.8147	77.549	82.0781	0.842854	0.713231	0.941487	1.17577	1.00047	0.878719	0.89805	0.853681	0.795144	1.21462	0.871238	0.672932	0.660619	0.71019	0.877665	0.726612	0.907121	0.56139	1.04426	1.01239	0.926759	1.08615	0.854388	0.758602
421.002	420.998	421.006	129.929	126.126	153.949	1.42769	0.779739	1.47603	3.63533	4.21182	3.91593	1.38545	0.983896	0.697435	3.21446	2.44974	1.83729	1.63273	0.809179	0.912372	2.77901	3.1485	2.28372	1.81236	0.910173	0.940091	2.0861	2.42245	1.9022
421.003	421	421.016	97.4636	95.991	102.937	0.625279	0.482704	0.712662	3.20885	3.58824	3.42127	1.02208	0.422194	0.348225	2.17152	2.87324	1.108	0.742509	0.419814	0.312162	1.86142	1.86077	0.90141	1.00786	0.362104	0.452901	1.22653	2.07957	1.38232
423.009	423	423.031	96.8577	93.1506	98.9648	0.114042	0.0560304	0.0916767	0.29723	0.376339	0.37414	0.14458	0.0871701	0.121576	0.207231	0.307719	0.151605	0.131958	0.0910406	0.0434637	0.209258	0.218368	0.0865522	0.172051	0.051848	0.0871054	0.130282	0.229212	0.208991
425.166	425.162	425.17	222.843	219.159	228.214	0.970873	0.880514	0.558074	0.66212	0.890278	0.839296	0.795246	0.928233	0.591461	0.615988	0.868471	1.11064	0.448287	0.436471	0.435537	0.662016	0.487496	0.579777	0.351565	0.421739	0.583711	0.475577	0.578068	0.620315
426.969	426.961	426.978	130.797	127.584	151.042	0.163224	0.0872145	0.189452	1.04155	1.22322	0.969019	0.162545	0.0818926	0.00473485	0.971869	0.449145	0.362485	0.214117	0.0552011	0.0670067	0.574072	0.918822	0.405176	0.2371	0.0396265	0.123527	0.374329	0.467147	0.360806
440.838	440.828	440.868	76.5676	74.2863	84.9053	1.96231	2.09577	2.19827	1.58395	1.95986	1.90275	2.25855	1.97001	2.11421	1.6706	2.12353	2.08422	2.22004	2.12573	1.89685	2.27379	1.91875	1.90066	1.77405	1.67428	2.05043	2.09165	2.96506	3.28596
442.984	442.98	442.988	131.781	128.941	154.2	0.314932	0.0655062	0.290116	0.662301	0.775922	0.700303	0.236517	0.187985	0.109927	0.736014	0.402782	0.31183	0.28915	0.11905	0.130223	0.580163	0.600387	0.402824	0.34278	0.153302	0.138534	0.362957	0.436775	0.364253
458.958	458.953	458.963	131.11	128.768	151.169	0.358275	0.160949	0.378326	0.792004	0.772035	0.846486	0.30642	0.271439	0.136683	0.532872	0.518558	0.419985	0.410648	0.183744	0.194827	0.587805	0.69427	0.509823	0.485499	0.198402	0.245802	0.417817	0.540047	0.437838
458.958	458.954	458.965	97.0819	95.991	102.465	0.25845	0.169885	0.221848	1.17518	1.20922	1.0359	0.456685	0.113889	0.109074	0.683782	1.01676	0.360693	0.324367	0.177746	0.125374	0.687752	0.655622	0.286546	0.497637	0.0875522	0.181944	0.549472	0.861191	0.599014
462.876	462.866	462.892	98.5593	95.0609	104.173	0.255754	0.181471	0.419288	0.717552	0.801236	0.635347	0.314077	0.314334	0.221847	0.596678	0.516721	0.404351	0.327844	0.232146	0.217389	0.474801	0.625228	0.424972	0.461153	0.326466	0.216	0.448461	0.596509	0.460435
463.217	463.205	463.243	260.306	241.772	288.61	1.80891	1.70515	1.393	1.45225	1.46783	1.65316	2.38261	1.78295	1.5251	1.50291	1.15006	1.35221	3.97843	3.16034	3.89022	3.67946	2.98115	3.61538	2.89426	2.37872	2.09205	1.80031	1.65828	2.42408
467.157	467.154	467.173	289.814	281.841	297.273	2.46365	2.94897	2.82616	2.75588	2.63953	2.27359	3.07816	3.31672	2.5649	2.33625	2.25456	2.42422	3.96294	3.65141	3.88131	4.0369	3.40188	3.31538	3.17448	2.86595	2.68586	2.89874	2.09457	3.3004
471.132	471.126	471.168	278.154	264.93	286.15	6.45109	7.8132	6.3219	5.67256	6.39406	5.77024	6.23806	6.80214	6.58751	5.38171	5.68408	4.81355	5.83206	3.28004	3.84744	2.85399	3.68214	3.42483	4.9966	5.45122	4.80333	4.4208	3.38226	4.1738
492.271	492.263	492.275	373.138	371.622	378.771	0.0703965	0.0580368	0.0254737	0	0	0.00816374	0.0403649	0.167096	0.0402544	0.0372371	0.0307932	0.023902	0.250952	0.196852	0.113401	0.0475292	0.0494572	0.0885773	0.152571	0.0898267	0.0987782	0.0156415	0.0144768	0.0472541
508.268	508.264	508.275	383.463	380.922	390.601	0.889021	0.818168	0.923605	0.647975	0.597283	0.674368	0.717551	0.834854	0.704283	0.599543	0.46458	0.716406	0.649249	0.842716	0.886334	0.544589	0.700029	0.773688	0.708535	1.1265	0.894449	0.608929	0.794	0.693628
513.305	513.294	513.31	411.533	399.332	419.662	1.19825	1.22016	0.553348	0.185761	0.134503	0.758077	1.12212	1.21894	0.90835	0.254193	0.531454	1.03152	1.59034	1.63541	1.34809	0.707384	0.547835	1.19862	1.02915	2.56251	2.27438	0.76622	0.447714	0.790096
519.279	519.273	519.284	379.16	378.703	380.368	0.142796	0.192563	0.10076	0.0395933	0.0617577	0.0867018	0.0912051	0.115695	0.0566025	0.00239348	0.0320917	0.0328789	0.0425497	0.122311	0.0554776	0.0179933	0	0.00974029	0.0303249	0.0618952	0.0486301	0.00304747	0.00527955	0
524.2	524.186	524.208	302.946	299.985	312.333	0.272383	0.298743	0.200893	0.218899	0.14376	0.200841	0.272525	0.215466	0.176479	0.0978385	0.0988966	0.0926445	0.184907	0.558612	0.453165	0.343287	0.405432	0.399156	0.249397	0.317457	0.432313	0.286029	0.317933	0.264395
525.27	525.264	525.275	410.483	409.319	418.387	0.414214	0.596275	0.938581	0.620174	0.790547	0.46715	0.509671	0.549381	0.779122	0.697644	0.512542	0.532882	1.04249	0.619052	0.759442	1.25735	1.1757	1.62749	0.697471	0.422022	0.780347	1.04634	0.814043	0.997727
531.315	531.297	531.321	349.307	327.85	359.695	0.348784	0.667065	0.319878	0.235901	0.220141	0.202834	0.350161	0.547437	0.497322	0.26622	0.329704	0.296354	0.341915	0.696535	0.551576	0.286009	0.484597	0.254168	0.269662	0.800023	1.17471	0.987049	0.552784	0.257067
534.923	534.92	534.925	527.034	517.492	530.785	0.73781	0.47201	0.417095	0.297694	0.269143	0.289502	0.505279	0.373337	0.269274	0.179728	0.366732	0.197831	0.157144	0.325881	0.0987577	0.209631	0.116122	0.0524733	0.202735	0.196374	0.14871	0.233766	0.194504	0.554463
535.312	535.307	535.317	518.053	517.394	519.154	0.202324	0.179618	0.163893	0.0428965	0.0139024	0.105129	0.129181	0.183076	0.0878402	0.0286749	0.0122671	0.0240858	0.149009	0.140365	0.0700146	0.0309005	0.00630055	0.0289656	0.0607543	0.119528	0.0516221	0.0198474	0	0.0305997
556.933	556.923	556.941	97.4023	96.3762	102.97	0.157107	0.101888	0.143371	0.860154	0.855898	0.796939	0.281999	0.120783	0.0563995	0.548829	0.56626	0.286976	0.202164	0.112118	0.0660697	0.423001	0.53832	0.309523	0.308563	0.0735373	0.105368	0.329445	0.637431	0.384808
561.259	561.253	561.268	346.746	344.561	347.857	0.291224	0.287867	0.234501	0.160083	0.141462	0.210304	0.268407	0.258913	0.18789	0.0686415	0.185235	0.0839353	0.307921	0.296189	0.299888	0.214304	0.182049	0.246815	0.290528	0.287601	0.139924	0.101266	0.0932938	0.180658
565.176	565.167	565.185	167.079	163.481	178.786	0.0321898	0.0948731	0.0616967	0	0.0031571	0.0375429	0.0282054	0.0640106	0.0154779	0	0.0130658	0.0058329	0.071252	0.131936	0.16905	0.11493	0.0447776	0.155566	0.0202163	0.0393312	0.0527708	0.0484703	0.0107451	0
565.284	565.27	565.289	379.123	361.406	380.655	0.405033	0.37686	0.296807	0.133793	0.114611	0.251755	0.230368	0.222828	0.155546	0.0811863	0.092314	0.11558	0.168111	0.24097	0.166794	0.0753886	0.0878379	0.100965	0.147911	0.184251	0.102165	0.0198778	0.0482391	0.0427236
578.304	578.286	578.315	382.883	381.089	383.717	0.0641735	0.101005	0.0473627	0	0.0199976	0.04329	0.0544933	0.0796938	0.0550751	0.0166239	0.0434228	0.0401475	0.352799	0.17464	0.116088	0.107569	0.0821507	0.155634	0.147247	0.0722633	0.0478812	0.0388598	0.0155651	0.0391774
592.304	592.296	592.313	348.38	345.985	361.545	0.358908	0.353653	0.327114	0.164703	0.13308	0.204448	0.377249	0.333953	0.226446	0.153214	0.230283	0.138392	0.437661	0.601098	0.505403	0.330916	0.313926	0.392302	0.277477	0.329782	0.217538	0.125089	0.148703	0.23399
596.32	596.306	596.326	385.647	369.127	392.257	2.23485	2.38134	1.94003	1.29018	1.35654	1.60665	1.72181	1.95961	1.65218	1.29505	1.06122	1.55419	2.4039	2.26634	1.93994	1.1136	1.40747	1.62267	1.68921	2.06236	1.72926	1.34983	1.23191	1.22428
605.284	605.279	605.294	299.069	297.704	300.304	0.204899	0.166682	0.18108	0.0916316	0.0975593	0.154983	0.225137	0.172463	0.191674	0.0958891	0.17309	0.170968	0.33778	0.204629	0.272241	0.344839	0.317555	0.380877	0.187926	0.104406	0.159711	0.118192	0.133661	0.128381
617.278	617.27	617.292	318.729	317.103	320.672	0.159047	0.11705	0.104877	0.0718945	0.0809227	0.178506	0.133428	0.123164	0.113097	0.0872164	0.0585244	0.111108	0.204976	0.165395	0.165433	0.166738	0.150533	0.138948	0.196675	0.121322	0.073835	0.108024	0.118359	0.164532
619.129	619.122	619.143	226.219	223.605	238.639	0.00698866	0.0685227	0.0338067	0.203377	0.175152	0.135448	0.067255	0.0325303	0.0964936	0.278767	0.202768	0.0813726	0.166488	0.260745	0.242608	0.34965	0.51428	0.31555	0.19996	0.0672163	0.143182	0.383197	0.272585	0.166363
625.266	625.254	625.273	246.796	244.21	260.711	0.79655	0.721297	0.600917	0.564389	0.536358	0.679265	0.780703	0.642241	0.523766	0.512184	0.325658	0.481944	1.82502	1.53439	2.01027	1.6971	1.2477	1.69495	1.18348	0.87256	0.903979	0.784041	0.777523	0.991058
629.354	629.348	629.358	338.727	336.502	340.186	15.1875	25.3808	18.7895	12.1451	13.1415	11.3663	15.3477	18.6363	20.4309	13.3317	11.545	7.93549	13.3732	24.3963	21.1213	14.2475	11.8755	6.83703	13.8341	32.1015	35.4107	34.2319	21.7799	10.2267
637.183	637.175	637.191	126.916	123.263	133.394	0.0500564	0.12583	0.134437	0.0299701	0.00995811	0.0759664	0.0640571	0.111046	0.151427	0.0550651	0.0493878	0.0353759	0.148284	0.153213	0.138286	0.153503	0.0736508	0.107906	0.0591261	0.0869294	0.147475	0.0840216	0.0525026	0.035454
643.255	643.242	643.267	313.4	312.148	314.29	0.943587	0.761886	0.795508	0.826722	0.767136	0.955265	0.987403	0.688349	0.720933	0.625012	0.617203	0.828071	0.969844	1.06048	1.49171	1.09537	1.36237	1.53488	1.0074	0.959632	0.940174	1.07958	0.93174	1.04938
643.262	643.251	643.268	293.258	292.323	294.296	0.505309	0.44713	0.373184	0.315799	0.334091	0.524943	0.546286	0.395964	0.390292	0.317636	0.318842	0.357516	0.61774	0.698251	1.10125	1.11272	0.920301	0.91069	0.542181	0.553332	0.617036	0.516175	0.567353	0.587232
647.102	647.096	647.11	93.9642	92.5665	95.9262	0.276516	0.297192	0.365684	0.200708	0.112546	0.146655	0.197815	0.225123	0.315372	0.168013	0.184549	0.21164	0.167416	0.179829	0.334072	0.19596	0.0952109	0.168395	0.0915305	0.160268	0.335664	0.156376	0.0444871	0.152323
657.29	657.272	657.299	323.245	319.589	329.188	0.262649	0.244454	0.256122	0.137567	0.157878	0.188661	0.198929	0.182688	0.184266	0.100611	0.104898	0.139713	0.271764	0.339745	0.428618	0.458657	0.379273	0.391707	0.196387	0.275831	0.265516	0.235684	0.196736	0.24177
657.325	657.31	657.343	374.402	347.169	391.764	3.57425	3.12269	2.74151	2.1172	2.224	2.46707	2.69459	3.02304	3.07371	2.2152	1.95609	2.94449	1.95815	1.51319	1.66702	1.01341	1.2335	1.31223	2.87329	2.15719	1.86452	1.27587	1.73233	1.95429
659.292	659.275	659.303	311.587	299.896	319.713	3.20013	2.3054	2.54893	2.30344	2.34196	2.74844	3.38767	2.22043	2.07939	2.11582	2.31654	2.40565	3.39117	2.92135	3.03926	2.48198	3.10984	2.30856	3.21276	2.74112	2.42105	2.39779	2.37652	2.93867
665.329	665.32	665.336	339.121	337.02	341.317	0.339295	0.462929	0.325665	0.236691	0.251335	0.232518	0.315374	0.359874	0.331198	0.237147	0.209719	0.151594	0.26934	0.479811	0.401201	0.280745	0.202981	0.118676	0.321321	0.571702	0.566399	0.608278	0.416525	0.195366
667.329	667.322	667.331	339.207	337.32	341.184	0.0596824	0.142542	0.0529493	0.0163191	0.0406629	0.0198172	0.0580781	0.075981	0.0608808	0.0345021	0.0388913	0.0125338	0.0413933	0.154026	0.108504	0.0742003	0.0244386	0.00910081	0.0579132	0.210365	0.15172	0.169339	0.0770871	0.0169255
669.333	669.309	669.343	383.934	372.054	403.193	0.883189	1.48581	1.29055	0.836978	0.888227	0.909083	0.998822	1.33188	1.1758	0.731527	0.72391	0.92095	1.05475	0.603193	0.526836	0.773529	0.536506	0.662545	0.878144	0.731512	0.781813	0.524241	0.554511	0.751446
671.276	671.271	671.283	246.087	243.93	247.422	1.29012	1.31752	1.09064	1.00468	1.00149	1.27532	1.32975	1.12927	1.07909	1.06814	0.889042	1.0862	2.8458	2.28195	2.92515	2.49448	2.03644	2.38984	1.8993	1.4747	1.47389	1.24488	1.30061	1.58008
673.342	673.319	673.366	327.918	314.284	364.191	5.02073	3.73021	4.62345	3.69895	3.16042	5.0865	4.03545	4.37363	4.06242	3.43769	2.73487	3.61846	4.83433	3.64718	3.49859	3.69752	3.22164	4.00494	4.77847	3.99741	3.24685	3.68147	3.373	3.95765
675.333	675.318	675.343	354.866	344.94	379.335	1.83199	1.7047	1.66899	1.30018	1.23664	2.08376	1.89809	1.54555	2.00283	1.20246	1.32775	1.77108	1.7062	1.3079	1.44892	1.09635	0.946743	0.81193	1.65165	1.67039	0.97481	0.945434	0.830724	1.25425
675.359	675.343	675.363	338.41	319.808	362.787	32.2194	53.665	38.8613	25.1834	26.7602	23.8237	32.8111	39.8213	44.7951	28.764	24.4513	16.9994	29.5394	55.1407	46.9649	31.897	26.6989	14.5973	29.5174	69.22	77.4272	75.8615	48.0218	22.0934
676.338	676.313	676.343	325.812	317.77	328.312	0.352249	0.285635	0.3483	0.223092	0.211247	0.352487	0.298128	0.277846	0.344843	0.266722	0.162656	0.260399	0.356626	0.369115	0.273593	0.38612	0.30803	0.284126	0.325264	0.329872	0.292248	0.297556	0.271732	0.28126
677.302	677.292	677.306	288.215	285.547	292.5	0.925982	0.790584	0.953459	0.752774	0.672718	0.883715	0.989597	0.782473	0.712559	0.696263	0.600813	0.693766	1.23062	1.00913	0.930314	1.07793	0.909358	0.962588	1.19397	0.95668	0.78071	0.885231	0.833829	0.954772
679.316	679.309	679.324	292.14	288.778	316.034	1.14911	0.833564	0.906914	0.540518	0.626688	0.751587	1.47636	1.07405	0.733411	0.806602	0.810481	1.01624	1.92459	1.4913	0.868035	1.30529	0.804927	0.964084	1.50611	0.829103	0.791823	0.774868	0.692803	0.894226
689.337	689.326	689.342	361.055	350.363	372.242	7.97311	7.10564	8.23092	7.4017	6.57642	8.27843	7.77021	6.1509	6.65696	5.7512	4.26247	7.56733	9.00304	6.04256	6.0655	7.02749	6.95445	6.84004	8.15752	7.0217	5.75305	6.85101	6.06261	8.30651
691.342	691.318	691.355	306.283	280.737	328.952	5.7838	5.33892	4.91852	4.15622	4.20742	6.08147	5.68658	5.21633	4.81896	4.42026	3.7863	4.80298	9.19196	5.35543	4.7468	4.49151	4.35415	4.73778	7.63943	5.08043	3.85184	4.23166	3.9601	4.83297
692.346	692.322	692.36	305.967	284.106	325.8	2.08452	2.04503	1.80073	1.58486	1.55646	2.27229	2.01028	1.86264	1.90038	1.56075	1.46723	1.73173	3.3645	1.95443	1.78388	1.63449	1.63826	1.6462	2.65506	1.79641	1.46611	1.56403	1.34593	1.76203
692.348	692.318	692.354	339.203	327.03	349.337	0.75932	0.84673	0.762336	0.517788	0.574944	0.572773	0.66241	0.718431	0.725803	0.626569	0.467855	0.541772	0.784673	0.961907	0.783436	0.696817	0.592758	0.417784	0.688708	0.987178	1.09425	1.24363	0.761455	0.583144
693.386	693.381	693.394	551.78	551.243	552.429	0.044968	0.041259	0.0827158	0.147017	0.16038	0.0256361	0.0728324	0.0768314	0.0888449	0.0866746	0.176317	0.0662736	0.0601321	0.0025573	0.0660343	0.0412558	0.163649	0.09361	0.0982492	0.0722539	0.111361	0.129952	0.0723136	0.0680209
693.386	693.38	693.392	514.997	514.434	515.668	0.246411	0.315516	0.431893	0.995367	0.882581	0.293345	0.328266	0.541353	0.428056	0.632962	0.698144	0.242225	0.407341	0.0930929	0.183231	0.107322	0.353512	0.166672	0.407832	0.364039	0.415828	0.458913	0.433942	0.306248
697.288	697.276	697.298	318.991	316.733	319.931	0.227719	0.186891	0.137897	0.0925546	0.0897074	0.183385	0.174716	0.10389	0.105169	0.119147	0.0743462	0.173395	0.295571	0.208403	0.166135	0.199335	0.164938	0.157923	0.261356	0.126398	0.096729	0.0963565	0.137994	0.235692
709.328	709.318	709.343	327.191	300.348	336.837	0.842489	0.457117	0.587685	0.44868	0.442843	0.485184	0.624209	0.437062	0.452841	0.382258	0.391388	0.441303	0.69054	0.73628	0.527586	0.746338	0.568382	0.540169	0.614203	0.563432	0.467281	0.473344	0.445235	0.521725
711.394	711.387	711.4	514.913	512.28	516.678	0.170162	0.305304	0.450293	0.975514	0.863673	0.287454	0.372396	0.527941	0.486073	0.571344	0.587606	0.276763	0.463439	0.108165	0.139007	0.118744	0.336795	0.148947	0.500743	0.395931	0.372199	0.496704	0.408111	0.335398
714.37	714.363	714.376	338.85	336.502	343.533	0.864134	1.22143	0.704222	0.609271	0.624731	0.591673	0.812668	0.890276	0.856096	0.623458	0.558747	0.471762	0.519931	1.12766	0.834625	0.745718	0.555146	0.274541	0.670724	1.36816	1.53707	1.68834	1.17638	0.499204
715.354	715.322	715.368	352.014	337.395	365.469	7.56846	5.35377	5.10538	4.14337	2.89841	1.74723	4.90925	6.61962	6.55553	3.54183	4.40715	2.6518	11.7879	9.18805	10.5907	5.03422	5.47913	4.64662	4.78519	8.09891	16.8725	9.22245	2.8681	5.67934
719.349	719.339	719.368	327.838	306.742	339.418	3.41279	3.01736	3.21953	2.87073	2.59069	3.76447	3.28692	2.92418	2.95001	2.64876	2.12899	2.84945	4.78393	3.14509	2.97153	3.10015	2.61386	3.06728	4.49066	3.28788	2.45902	2.65583	2.39252	3.1916
721.361	721.35	721.371	361.94	354.441	373.868	1.07768	0.848939	0.839757	0.737364	0.563473	0.939064	1.77835	0.896686	0.827015	0.668526	0.682263	0.749051	1.09255	0.905174	0.621311	0.882419	0.950905	0.800264	1.07083	0.987292	0.858875	0.71364	0.817999	1.16416
723.22	723.213	723.241	296.378	283.918	305.796	2.66467	2.83209	1.49008	1.41899	2.09598	2.2613	3.61807	2.14186	1.98088	1.84675	1.41003	2.03715	4.24607	3.57068	3.66097	2.48471	2.2289	2.40439	2.19699	1.44709	1.78753	2.62348	2.15989	2.17683
723.337	723.323	723.346	307.241	303.154	309.129	0.955957	0.592419	0.584261	0.366194	0.352125	0.667517	1.00284	0.780473	0.598032	0.444951	0.587489	0.455814	1.41743	1.12298	0.656274	0.650184	0.550076	0.649613	1.03397	0.702308	0.479762	0.430833	0.428137	0.645984
723.381	723.375	723.389	465.431	464.852	466.394	0.305827	0.233284	0.323365	0.400333	0.316618	0.208376	0.318804	0.294687	0.257932	0.282254	0.288946	0.161622	0.449887	0.333925	0.409685	0.300595	0.294329	0.294048	0.283354	0.295582	0.257384	0.235201	0.216914	0.297881
727.39	727.386	727.397	455.455	454.359	467.015	1.92684	1.41466	1.47988	1.28756	1.12884	1.15341	1.26846	1.51197	1.26756	0.872678	0.96242	1.06782	1.09483	0.849962	0.60855	0.563917	0.729483	0.764138	1.19472	1.40072	1.06605	0.797924	1.04608	1.14733
728.155	728.148	728.193	201.37	196.077	209.632	0.968714	0.719069	0.569369	0.2492	0.225628	0.600762	0.664188	0.589594	0.437021	0.199403	0.234474	0.79637	0.534153	0.545088	0.346756	0.202086	0.184038	0.50595	0.57004	0.582269	0.362558	0.158344	0.133794	0.405057
729.405	729.397	729.411	435.229	433.311	441.927	1.07792	0.890444	0.904292	0.699004	0.620634	0.770866	0.719628	0.831481	0.67117	0.558832	0.515033	0.709629	0.597139	0.442811	0.299349	0.230993	0.26995	0.281256	0.624217	0.591697	0.458896	0.32631	0.338685	0.37653
730.332	730.32	730.364	306.768	295.908	319.961	0.290586	0.27703	0.211493	0.154199	0.137602	0.326559	0.330161	0.286328	0.221968	0.14105	0.125128	0.284409	0.516954	0.309251	0.251904	0.298026	0.208919	0.247165	0.404512	0.212955	0.185241	0.243948	0.153	0.264547
731.35	731.342	731.356	361.398	348.092	362.171	1.14493	1.00147	0.880006	0.688805	0.769675	0.905666	0.949028	0.899418	0.929117	0.655062	0.734765	0.841683	0.91205	0.607464	0.552122	0.444439	0.493299	0.544485	0.919593	0.791915	0.657508	0.450494	0.514052	0.608981
739.395	739.393	739.408	551.989	535.099	553.582	0.458252	0.48988	0.691631	1.06269	1.04904	0.445313	0.616082	0.793588	0.731967	0.739832	0.999378	0.506114	0.62958	0.185816	0.425534	0.326558	0.786682	0.459717	0.68766	0.53223	0.656044	0.750572	0.588114	0.500162
741.407	741.398	741.412	505.951	505.481	519.597	1.47219	1.72612	2.20934	3.81936	3.6886	1.40771	2.09488	2.67513	2.23586	2.60618	3.28296	1.43706	2.31137	0.65636	1.36637	0.84436	1.73958	1.34136	2.43169	1.95197	2.06635	1.93157	1.57263	1.64411
742.069	742.063	742.076	127.449	125.554	133.937	0.837794	0.670313	0.702898	0.427928	0.513597	0.912866	0.58502	0.690657	0.608778	0.315579	0.227246	0.6113	0.493597	0.390082	0.279376	0.12755	0.13085	0.2104	0.510215	0.546133	0.405213	0.103477	0.250073	0.445991
743.348	743.344	743.358	339.181	337.02	354.268	2.01265	2.85936	2.4444	1.86842	1.89974	1.67844	2.07801	2.13394	2.32768	1.84895	1.3431	0.954969	1.62672	2.55514	2.37602	1.6979	1.29198	0.976611	2.01712	3.97062	3.70127	3.91514	2.97168	1.45099
745.396	745.39	745.404	322.236	320.325	323.689	0.435422	0.379952	0.305936	0.180207	0.242219	0.415586	0.343993	0.336474	0.26315	0.210957	0.304201	0.268592	0.431783	0.305323	0.16489	0.122958	0.120832	0.211872	0.348034	0.29284	0.186988	0.126793	0.135444	0.177968
746.327	746.318	746.335	319.041	317.132	322.006	0.555426	0.39155	0.429903	0.429798	0.281428	0.455163	0.495219	0.319102	0.33567	0.369976	0.254516	0.511002	0.649368	0.498543	0.489597	0.536219	0.430561	0.382671	0.53516	0.404159	0.376491	0.479269	0.378232	0.570271
747.379	747.353	747.387	338.882	320.598	341.237	0.178935	0.306156	0.221953	0.129517	0.138772	0.144026	0.210106	0.229419	0.252225	0.186276	0.170012	0.100203	0.183116	0.28102	0.26741	0.222351	0.229006	0.108824	0.2125	0.513902	0.505583	0.539039	0.398881	0.149416
751.37	751.343	751.379	327.444	318.25	328.693	0.592154	0.436085	0.393159	0.338846	0.29116	0.493534	0.655506	0.494427	0.393913	0.390486	0.448987	0.323611	0.804069	0.760273	0.409225	0.539669	0.434742	0.42911	0.712359	0.476803	0.335215	0.368846	0.387164	0.57621
753.406	753.397	753.41	458.874	458.149	465.713	2.19565	2.06034	3.17981	4.31737	3.9457	2.16498	2.61894	3.20403	2.76297	3.72547	2.96562	2.02221	1.9788	1.3963	1.27036	1.00831	1.66728	0.993528	2.49013	2.85568	2.97696	2.77829	3.02316	2.4412
754.214	754.208	754.224	239.327	234.797	262.188	0.88486	1.06416	1.06627	0.697401	0.559917	0.462079	0.991709	0.885195	0.888245	0.586525	0.577745	0.342261	1.23768	0.893591	0.423188	0.284802	0.154159	0.152761	0.913109	0.726397	0.433151	0.117665	0.230576	0.337145
757.401	757.393	757.408	514.788	514.229	515.529	0.708318	0.984691	1.31867	2.82707	2.4704	0.908803	1.04879	1.55665	1.27114	1.80369	1.87577	0.704089	1.158	0.368205	0.580604	0.383603	1.00618	0.502746	1.29069	1.09882	1.2612	1.40863	1.15555	1.00753
757.403	757.397	757.413	408.618	399.57	409.414	1.72344	1.48181	1.48048	0.94319	1.2128	1.62638	1.47915	1.49984	1.25505	0.992178	1.4888	1.56887	1.66599	1.01935	1.11649	0.782582	0.803226	1.07002	1.33564	1.42544	1.08953	0.735374	0.833434	1.16735
767.379	767.366	767.387	338.468	337.326	341.707	0.275114	0.299453	0.299903	0.107357	0.13318	0.187837	0.266545	0.264849	0.171571	0.12788	0.140688	0.137094	0.340264	0.433341	0.289458	0.325943	0.244463	0.246135	0.25176	0.365346	0.279289	0.189982	0.24479	0.199432
771.415	771.393	771.422	458.893	443.584	459.882	2.14115	1.70002	2.65823	3.65283	3.09754	1.75697	2.19011	2.63824	2.28832	2.87704	2.54657	1.8434	1.63998	1.22814	1.12042	0.893585	1.36877	0.959393	2.1996	2.30725	2.49714	2.34225	2.46464	2.08046
773.396	773.373	773.403	382.29	363.306	390.471	1.51774	1.75383	1.79518	1.06672	1.45331	1.54086	1.68985	1.421	1.38531	0.887824	1.50741	1.10177	1.80275	1.04411	1.08003	0.934155	1.03205	1.21626	1.38515	1.60148	1.05011	0.929987	1.18144	0.908982
781.196	781.187	781.205	102.548	96.1491	114.303	0.238502	0.304549	0.367491	0.0628386	0.0677852	0.0436322	0.081762	0.283447	0.190612	0.0601718	0.0763802	0.148382	0.118429	0.0268199	0.210683	0.112873	0	0.0943015	0.00492086	0.0163663	0.119686	0	0	0.0104619
783.344	783.338	783.356	352.133	345.141	355.933	0.505976	0.496284	0.432376	0.280238	0.190884	0.12917	0.348928	0.389271	0.348575	0.243653	0.219814	0.311883	0.447482	0.674592	0.498297	0.27494	0.256666	0.174107	0.371935	0.559936	0.98946	0.666525	0.248614	0.415749
783.415	783.41	783.423	455.532	454.602	457.808	0.34021	0.295635	0.234889	0.212891	0.263665	0.207971	0.317476	0.338028	0.246631	0.194568	0.257301	0.167655	0.242107	0.17795	0.155276	0.0528485	0.1441	0.185657	0.225364	0.251665	0.26713	0.145838	0.109759	0.20561
784.346	784.337	784.355	346.709	345.488	355.033	0.175047	0.110845	0.132178	0.0759964	0.0267655	0.0104453	0.115328	0.117386	0.134202	0.0441364	0.0714558	0.0284182	0.251215	0.222355	0.199593	0.0508378	0.104156	0.0787862	0.101975	0.225187	0.358441	0.227068	0.0549171	0.115939
787.408	787.393	787.44	426.489	415.744	444.492	1.66598	2.18336	2.37664	2.55381	2.5292	1.72406	2.10842	1.87132	2.1041	2.34885	1.88324	1.51354	1.63051	1.50429	1.38065	1.29275	1.61776	1.25218	1.83196	1.86392	1.88116	1.94493	2.26923	1.59743
787.409	787.393	787.42	372.635	342.937	384.136	1.09929	1.58373	1.11454	1.23632	1.17805	1.17259	1.18155	1.28299	1.05095	1.04191	0.901311	1.14974	1.41344	1.14581	1.12673	0.924968	1.02552	0.921892	1.11024	1.09185	0.903017	0.856516	0.946074	1.04576
789.395	789.385	789.41	343.958	340.243	347.417	0.448493	0.472331	0.406387	0.322246	0.43878	0.507718	0.469644	0.397762	0.347448	0.316917	0.449641	0.397804	0.379655	0.322335	0.275987	0.228621	0.303559	0.309094	0.380721	0.346331	0.26856	0.214872	0.312153	0.304746
789.414	789.397	789.418	370.876	358.283	377.599	0.73836	0.698879	0.734134	0.501093	0.63464	0.733918	0.716614	0.691926	0.650345	0.456532	0.549041	0.592243	0.727375	0.565341	0.485916	0.489208	0.51849	0.489589	0.770825	0.594624	0.513872	0.48984	0.448912	0.6098
797.43	797.418	797.441	474.142	462.023	486.846	0.435437	0.539251	0.406704	0.321692	0.356758	0.453531	0.514865	0.552305	0.425586	0.306531	0.249467	0.295493	0.633404	0.330582	0.616539	0.267613	0.449944	0.426688	0.552374	0.298799	0.411301	0.347172	0.268387	0.577234
800.283	800.276	800.299	295.178	291.415	307.014	0.0940546	0.222443	0.240817	0.265771	0.308157	0.25189	0.161644	0.110933	0.225045	0.25319	0.24246	0.253342	0.063485	0.174747	0.199983	0.218282	0.215253	0.169067	0.159802	0.152686	0.199895	0.287768	0.249729	0.244387
805.393	805.383	805.404	326.263	320.496	328.353	0.430611	0.363347	0.481174	0.303227	0.391615	0.413749	0.435126	0.413973	0.344953	0.256935	0.337927	0.336849	0.528875	0.383622	0.337943	0.32028	0.314635	0.366262	0.420732	0.399716	0.330933	0.273973	0.315724	0.326708
809.41	809.397	809.417	505.619	504.053	506.147	0.0998108	0.0859549	0.156832	0.345164	0.255069	0.0734331	0.114804	0.197867	0.167274	0.225873	0.191369	0.114868	0.194045	0.0198487	0.108595	0.0596741	0.122846	0.119033	0.169258	0.124534	0.130012	0.147458	0.0968585	0.118297
816.411	816.404	816.419	442.979	442.242	443.799	0.276404	0.222479	0.225113	0.3038	0.313729	0.155352	0.254562	0.243077	0.283222	0.240758	0.260149	0.141461	0.173296	0.141999	0.143797	0.129749	0.177459	0.135856	0.132161	0.228969	0.222109	0.163855	0.220126	0.161619
823.363	823.356	823.376	298.721	297.28	307.908	0.251696	0.238204	0.273846	0.159808	0.131888	0.276303	0.261458	0.18344	0.202208	0.143638	0.102773	0.206422	0.552845	0.318925	0.324819	0.412392	0.344511	0.424329	0.412859	0.245833	0.188327	0.252089	0.233668	0.28003
825.402	825.386	825.417	514.582	513.691	515.194	0.0896431	0.0957624	0.142781	0.401587	0.312907	0.120355	0.105879	0.216486	0.182734	0.215085	0.227384	0.0929096	0.153187	0.0386067	0.078255	0.0313983	0.117907	0.0515108	0.136939	0.112461	0.12478	0.177604	0.142734	0.132078
835.393	835.368	835.401	304.903	282.312	307.625	1.8146	1.58185	1.63874	1.78525	1.12767	1.6783	1.68778	1.43772	1.64755	1.42935	1.16723	1.51792	2.4636	2.35031	1.74317	1.71509	1.54411	1.71549	2.09335	1.72563	1.49521	1.29013	1.37527	1.75373
854.129	854.123	854.14	127.992	125.124	131.377	0.493868	0.28942	0.440565	1.02653	0.806802	0.702966	0.559613	0.409615	0.257907	0.538553	0.793992	0.611219	0.748883	0.483603	0.426542	0.543564	0.560766	0.607624	0.565906	0.291513	0.28318	0.511098	0.481066	0.467888
873.482	873.475	873.492	339.614	338.82	340.48	0.0126808	0.111464	0.0730499	0.00628482	0.0189712	0	0.00652209	0.0488788	0.105015	0	0	0.0120884	0.0993478	0.291099	0.398104	0.348907	0.123114	0.12672	0.0219719	0.157519	0.223583	0.219563	0.119508	0.0305439
881.4	881.39	881.418	306.253	300.805	327.101	1.0144	0.995502	0.931651	0.73458	0.802143	1.17298	1.04645	1.00573	1.00662	0.836146	0.78493	0.935045	1.79342	1.24182	1.07395	1.1174	0.971088	1.22018	1.50615	1.01836	0.888565	0.788757	0.773351	0.998786
915.459	915.454	915.468	415.437	398.367	425.929	1.08881	1.02106	1.45518	1.84005	1.62658	1.08928	1.29154	1.44937	1.38622	1.4879	1.16281	0.870001	0.96929	0.618949	0.621303	0.457199	0.675517	0.545359	1.11662	1.26556	1.27437	1.06497	1.22204	1.00907
933.469	933.464	933.493	415.7	401.759	416.685	2.37212	2.29185	3.49832	4.62949	3.9543	2.49201	3.06548	3.32948	3.23536	3.86578	2.88767	2.29966	2.43184	1.61103	1.52083	1.17707	1.60093	1.35195	2.59186	2.9377	3.03399	2.69957	2.99361	2.62146
935.476	935.468	935.483	415.847	414.106	416.724	0.315464	0.32124	0.518568	0.692544	0.588691	0.359095	0.396949	0.493953	0.504848	0.556094	0.450654	0.338882	0.329955	0.21077	0.177157	0.147111	0.193048	0.175225	0.374761	0.47063	0.422792	0.364404	0.435734	0.315255
1259.72	1259.7	1259.73	338.303	336.803	339.687	0.0478431	0.219875	0.11551	0	0.00221779	0	0.0199256	0.0815918	0.158889	0	0.00297015	0	0.0500279	0.237596	0.181044	0.0732907	0.0942164	0	0	0.300932	0.518188	0.392817	0.0977624	0

## Sheet: Oscillating metabolites in root
						Control_Average value of each time point												W+OS_Average value of each time point						W+W_Average value of each time point
mz	mzmin	mzmax	rt	rtmin	rtmax	2 pm	6 pm	10 pm	2 am	6 am	10 am	2 pm	6 pm	10 pm	2 am	6 am	10 am	2 pm	6 pm	10 pm	2 am	6 am	10 am	2 pm	6 pm	10 pm	2 am	6 am	10 am
110.027	110.023	110.03	137.359	134.68	155.437	0.146266	0.0649344	0.294466	0.264004	0.180809	0.20917	0.130139	0.205296	0.338319	0.151472	0.115565	0.148356	0.187442	0.169477	0.166273	0.193911	0.270822	0.262567	0.31897	0.187199	0.400124	0.182246	0.291208	0.283645
128.962	128.96	128.964	84.3127	75.2621	89.1368	6.93326	7.163	7.84913	6.95813	7.33156	7.47382	5.38652	5.70104	7.12078	6.1826	7.45098	7.0581	6.8779	7.12153	6.52974	5.8954	6.74999	4.48806	6.99702	7.66576	6.62066	6.69521	7.15776	6.7962
129.058	129.054	129.06	258.939	257.441	259.695	0.0591929	0.0861267	0.116698	0.119993	0.176988	0.0753438	0.0979841	0.125369	0.147857	0.125455	0.144896	0.102796	0.128301	0.106315	0.123541	0.180427	0.183045	0.173948	0.120686	0.106152	0.198145	0.162161	0.15048	0.170855
136.035	136.032	136.039	88.6866	85.2926	90.3511	0.349072	0.295903	0.235209	0.482734	0.281739	0.304693	0.373135	0.330497	0.363428	0.449018	0.459245	0.325021	0.296261	0.449496	0.220254	0.313955	0.259242	0.174247	0.327008	0.303852	0.436876	0.389523	0.298293	0.506707
137.026	137.024	137.029	185.415	182.133	189.488	0.773243	0.856001	0.824858	0.989995	0.885725	0.852589	0.842507	0.831047	0.869811	1.02639	0.940473	0.892864	0.748485	0.780172	0.818795	0.993186	0.990315	0.927312	0.885345	0.958268	1.14672	1.05601	0.98582	0.910388
137.026	137.023	137.03	224.006	222.675	226.179	0.391373	0.315331	0.666234	1.21701	0.911004	0.583315	0.428232	0.569022	0.870163	1.08542	0.864888	0.640651	0.540501	1.23414	1.0231	1.70326	1.38787	0.914449	0.621575	0.362686	1.00997	0.829252	0.74141	0.512972
137.026	137.024	137.028	337.34	335.464	341.886	0.643881	0.66657	0.928203	1.16808	1.13152	0.932663	0.717221	0.832887	1.32068	1.33646	1.21649	1.0286	1.04742	2.58025	1.30859	2.02707	1.52627	1.53285	1.07711	1.0055	1.73786	1.19016	1.03575	1.28942
140.037	140.032	140.041	137.832	134.697	156.023	0.147458	0.0557796	0.314517	0.199111	0.165473	0.153039	0.166077	0.182899	0.268805	0.222147	0.130637	0.158965	0.185673	0.203304	0.190644	0.212021	0.18593	0.245547	0.279636	0.254468	0.428303	0.212534	0.268525	0.239729
144.047	144.044	144.051	318.385	317.168	320.041	0.0646435	0.0740948	0.126052	0.129813	0.156921	0.150664	0.0508923	0.125202	0.123367	0.0911604	0.112934	0.119418	0.199951	0.16834	0.201056	0.266962	0.251079	0.192871	0.0974471	0.0843097	0.215703	0.15297	0.172373	0.18608
147.047	147.044	147.052	192.103	189.92	199.323	1.12674	1.39398	1.38971	1.15866	1.07236	1.14019	1.02516	1.24522	1.45478	1.07129	0.917009	0.966335	1.20936	2.02722	1.75634	1.50156	1.41528	1.26825	0.989211	2.11111	2.14521	1.84682	1.54141	1.22463
153.021	153.017	153.025	200.89	179.02	206.235	0.0565226	0.105588	0.198206	0.238469	0.246664	0.16231	0.0925916	0.180361	0.202231	0.281239	0.185331	0.156368	0.135645	0.131053	0.169345	0.140187	0.156637	0.123427	0.213879	0.168907	0.337246	0.24324	0.224648	0.234468
152.995	152.991	152.997	101.856	99.1654	108.074	0.123714	0.170695	0.18693	0.196223	0.235364	0.194141	0.0967956	0.102746	0.155413	0.188572	0.220493	0.0901611	0.135588	0.0850691	0.131798	0.052157	0.0946611	0.0577876	0.138595	0.134365	0.140704	0.165223	0.15428	0.0919096
155.073	155.07	155.075	268.701	267.326	270.34	0.118761	0.163231	0.304837	0.280867	0.332803	0.331876	0.109857	0.140468	0.328267	0.26179	0.26789	0.190899	0.292795	0.308597	0.336662	0.403874	0.345969	0.438225	0.202928	0.135252	0.408738	0.176656	0.191156	0.400902
163.027	163.026	163.034	161.487	151.125	177.489	5.48283	6.08189	6.55425	8.28567	6.26823	6.0686	3.82117	6.58186	5.87753	6.99207	5.48068	6.35371	6.19552	6.07616	7.36821	5.71645	6.27285	6.12787	8.01336	6.28895	8.73021	6.27933	7.68059	8.01401
163.042	163.036	163.061	283.811	264.855	286.048	0.161917	0.13246	0.108049	0.115468	0.203789	0.0883551	0.155913	0.11895	0.14823	0.145824	0.224743	0.128826	0.148628	0.203137	0.216898	0.232756	0.231396	0.13669	0.207048	0.269264	0.253222	0.238399	0.192144	0.157998
164.072	164.071	164.073	192.047	189.445	195.97	10.8744	12.2217	12.4787	11.0933	9.73345	9.83343	9.0626	11.0637	13.0202	9.82592	8.55292	8.69708	10.1711	18.5356	16.2384	13.7951	12.6315	10.7591	9.48978	18.1785	19.2197	15.9862	14.1105	10.8464
169.123	169.119	169.128	433.158	431.2	436.066	0.0859098	0.0849044	0.103508	0.104919	0.0825271	0.095128	0.0536774	0.0539801	0.0842063	0.0691851	0.108462	0.0793653	0.0836579	0.100417	0.0889289	0.188645	0.0982981	0.102472	0.0553175	0.025661	0.0893285	0.0767651	0.0711557	0.0892844
186.113	186.11	186.117	257.901	256.439	259.155	0.489888	0.382913	0.326242	0.749342	1.16164	0.285432	0.241694	0.611009	0.379735	0.774369	0.58949	0.476347	0.218073	0.775441	0.472734	0.806047	0.457127	0.398617	0.856444	0.739358	0.96664	0.680363	0.613608	0.358312
189.076	189.071	189.079	239.87	237.407	241.136	0.133577	0.199575	0.268077	0.278066	0.344478	0.234704	0.228182	0.241577	0.35021	0.2937	0.305679	0.376657	0.243618	0.161043	0.388574	0.326384	0.363751	0.312396	0.308373	0.255062	0.31049	0.32698	0.407808	0.330927
194.078	194.051	194.082	260.272	258.915	273.74	0.198348	0.179171	0.13255	0.187906	0.301298	0.177598	0.216977	0.170927	0.213372	0.231669	0.359646	0.216227	0.219965	0.188282	0.227174	0.191985	0.153928	0.209688	0.250036	0.205554	0.246497	0.215082	0.202093	0.232027
196.037	196.034	196.041	244.426	243.274	245.332	0.0557971	0.0767099	0.0758606	0.190192	0.223747	0.0801557	0.0862758	0.0474117	0.153304	0.132942	0.219515	0.165761	0.105802	0.110318	0.123157	0.190234	0.1954	0.197088	0.0978281	0.110614	0.150661	0.19265	0.178963	0.157568
200.056	200.052	200.06	137.769	132.887	155.941	0.977985	0.781275	1.78806	1.30427	1.20261	1.23922	1.06141	1.21057	1.64925	1.28319	1.04208	1.04001	1.28022	1.32788	1.11236	1.23348	1.40647	1.5413	1.80088	1.42252	2.34075	1.41986	1.62305	1.45961
203.092	203.086	203.097	276.195	274.914	277.407	0.0285777	0.0269137	0.0597103	0.0783379	0.128507	0.0779597	0.0317315	0.0596627	0.136945	0.0736967	0.115656	0.12533	0.0525485	0.0384622	0.123694	0.0949444	0.121078	0.0900551	0.0877148	0.0743745	0.119373	0.102249	0.169682	0.138248
209.116	209.114	209.122	481.273	480.217	482.575	0.0770851	0.0810433	0.144502	0.138898	0.0984231	0.156132	0.0550053	0.0849477	0.110242	0.129655	0.106229	0.147677	0.0869873	0.128316	0.0927525	0.17031	0.165238	0.158034	0.102126	0.0755809	0.175135	0.121747	0.163095	0.146397
211.052	211.03	211.06	244.589	242.275	248.451	0.294409	0.286643	0.19921	0.458214	0.768938	0.325586	0.227029	0.254737	0.331301	0.282115	0.517733	0.329	0.280224	0.373974	0.216461	0.597474	0.471552	0.32639	0.275456	0.424696	0.497796	0.528127	0.457428	0.485274
217.107	217.104	217.11	277.023	274.815	278.192	0.451356	0.635615	0.782666	0.812678	0.775587	0.663084	0.465225	0.683772	0.806854	0.599613	0.798707	0.646365	0.840681	0.838864	0.692162	0.865328	0.655857	0.976883	0.532491	0.566438	0.738167	0.462615	0.713967	0.91329
225.042	225.039	225.046	280.5	277.87	281.663	0.140349	0.0522379	0.171977	0.207898	0.262932	0.161968	0.145825	0.155901	0.182119	0.17775	0.181197	0.135945	0.115906	0.0944837	0.325314	0.147096	0.154162	0.158349	0.127548	0.0847825	0.120527	0.164497	0.142716	0.127598
225.052	225.047	225.058	301.79	301.266	302.444	0.0644464	0.0783894	0.105427	0.103105	0.137502	0.0968447	0.0236816	0.0995038	0.126613	0.12413	0.138923	0.100677	0.0975256	0.173919	0.11519	0.185318	0.067461	0.105742	0.0995392	0.0778792	0.0855498	0.117258	0.0660715	0.0898386
227.127	227.125	227.131	384.623	373.936	387.259	0.217904	0.31346	0.475137	0.594718	0.375154	0.436068	0.431812	0.335812	0.553526	0.456578	0.446996	0.427955	0.450196	0.461482	0.586421	0.902455	0.674156	0.74706	0.438539	0.441015	0.399803	0.577511	0.789235	0.676093
227.127	227.121	227.129	366.636	365.043	372.942	0.21938	0.136216	0.399185	0.247399	0.35505	0.293293	0.173513	0.249612	0.337176	0.274163	0.308875	0.288805	0.300284	0.248287	0.313725	0.42636	0.339882	0.357723	0.242351	0.0997007	0.345147	0.341374	0.254026	0.372615
228.997	228.995	229.002	163.498	157.456	174.308	0.15269	0.096443	0.18265	0.327799	0.173294	0.199204	0.0768705	0.261454	0.215398	0.322676	0.0667861	0.198305	0.151772	0.211466	0.233044	0.144283	0.19361	0.169764	0.215675	0.139814	0.287995	0.226509	0.152294	0.288882
231.123	231.119	231.127	313.275	311.811	314.77	0.629068	0.867752	0.891445	1.11442	0.974001	0.84106	0.770805	0.674562	0.984324	0.811633	0.894681	0.839302	1.01468	1.07332	1.05276	1.08494	0.971548	1.23478	0.842387	0.611132	0.959899	0.798306	1.16007	1.09343
243.061	243.059	243.063	137.89	132.887	162.302	6.57292	5.47116	11.8113	8.79492	8.43068	7.87252	6.52798	7.67057	10.6483	8.38097	6.90022	6.81359	8.28312	8.61825	7.35886	7.92513	9.4372	10.2757	12.2648	9.94954	14.9903	9.06133	10.8079	9.82227
245.04	245.037	245.043	82.3223	79.681	83.418	0.575387	0.585897	0.617948	0.596478	0.527552	0.667185	0.469556	0.566806	0.697976	0.609161	0.630207	0.588349	0.57373	0.692127	0.689727	0.677656	0.780175	0.746017	0.472314	0.53192	0.653642	0.579257	0.605681	0.632433
245.042	245.038	245.045	99.9024	95.666	107.244	1.54783	1.56817	2.03152	1.6645	1.96671	1.87769	1.32702	1.67481	1.85346	1.60337	1.98483	1.69143	1.53817	1.80508	2.02345	1.80001	1.90717	1.9916	1.61484	1.64528	2.21545	1.88712	2.08616	1.54834
245.138	245.134	245.141	379.677	378.765	380.591	0.361942	0.537291	0.464444	0.687726	0.576002	0.467403	0.357634	0.343991	0.469568	0.548693	0.453879	0.515937	0.630475	0.848755	0.839637	0.823989	0.889711	0.960635	0.57841	0.451589	0.457704	0.377423	0.7961	0.800973
250.143	250.14	250.148	601.936	599.837	603.604	0.135572	0.124841	0.0767937	0.0994426	0.17887	0.140211	0.106946	0.143171	0.107151	0.115527	0.161856	0.152218	0.261651	0.206699	0.232842	0.246964	0.264192	0.282436	0.220255	0.188153	0.214187	0.141145	0.21318	0.201443
259.021	259.017	259.022	99.1437	93.0569	121.633	6.12613	5.26589	5.94942	6.81155	6.96394	6.20136	6.03935	5.99805	5.85255	6.24931	6.85164	4.63311	5.68078	5.85747	4.74336	5.09784	5.65863	5.54781	7.13248	7.43276	7.50692	6.69845	7.14918	5.57504
259.128	259.123	259.132	169.063	162.199	177.876	0.172849	0.284637	0.483947	0.507175	0.46501	0.271473	0.262284	0.440355	0.276352	0.426687	0.443318	0.161166	0.328847	0.322182	0.324633	0.218711	0.249609	0.193686	0.403885	0.364281	0.453789	0.55045	0.308701	0.531642
267.962	267.957	267.966	84.7177	82.3943	88.0381	0.584305	0.551447	0.452247	0.440534	0.3186	0.378494	0.497365	0.458049	0.407577	0.4091	0.370126	0.278231	0.36528	0.340658	0.336681	0.25495	0.267453	0.174912	0.449101	0.514869	0.417086	0.322885	0.323344	0.179909
269.135	269.11	269.142	379.659	368.064	381.705	0.347274	0.444279	0.474515	0.412533	0.389126	0.390397	0.336575	0.403544	0.430802	0.433725	0.430238	0.416265	0.528097	0.515422	0.409169	0.471095	0.389486	0.556298	0.447437	0.421407	0.324401	0.320439	0.439358	0.485101
273.184	273.18	273.189	492.891	492.394	494.158	0.220538	0.161538	0.440796	0.141239	0.16884	0.209413	0.154408	0.261211	0.255961	0.189533	0.239012	0.134694	0.21574	0.131534	0.105288	0.194152	0.120753	0.150541	0.148667	0.118607	0.184689	0.243738	0.147567	0.163529
274.092	274.088	274.094	189.858	187.745	192.59	0.0212016	0.105025	0.193158	0.130678	0.127148	0.0694387	0.0581354	0.0926074	0.155761	0.0965466	0.12904	0.00287459	0.0355941	0.0494061	0.0820875	0.0100185	0.0724262	0.0117627	0.0522228	0.0597369	0.150931	0.149485	0.0289913	0.0254499
279.913	279.909	279.918	76.6849	75.54	77.4883	0.204516	0.167679	0.105046	0.172554	0.159477	0.252609	0.211331	0.124644	0.176563	0.178559	0.141005	0.232184	0.134861	0.160656	0.13956	0.161614	0.168909	0.174521	0.173423	0.215319	0.17646	0.144127	0.267969	0.14491
283.155	283.151	283.157	380.09	379.604	380.914	0.0126947	0.033807	0.108877	0.109594	0.0851701	0.0825252	0	0.0434217	0.0921738	0.0650187	0.0429026	0.0738571	0.0971118	0.0829123	0.105678	0.102265	0.0711735	0.142497	0.0149985	0.00232019	0.0576412	0.0183646	0.0195157	0.0878649
289.154	289.15	289.159	245.698	236.312	247.254	0.0587095	0.0314567	0.12208	0.1938	0.22213	0.125181	0.0737876	0.0813564	0.17712	0.13442	0.187184	0.191998	0.157193	0.103763	0.207658	0.236278	0.271805	0.298072	0.174874	0.125271	0.287452	0.31275	0.413838	0.343935
291.196	291.192	291.199	478.545	459.967	479.451	1.81088	1.2829	2.11489	2.99124	2.85044	2.01376	2.08639	2.21813	2.64783	2.84767	2.03767	1.71538	2.71378	3.39277	3.61426	4.1296	3.84376	2.31933	1.94003	3.06279	3.08335	2.27695	2.8846	2.81939
291.196	291.193	291.201	433.177	432.42	442.564	0.353192	0.383503	0.520309	0.356422	0.408274	0.551416	0.353245	0.376165	0.43734	0.477129	0.424078	0.42831	0.462876	0.44904	0.44058	0.400254	0.419871	0.459081	0.405302	0.340825	0.49506	0.395458	0.35382	0.434658
299.076	299.074	299.079	185.459	182.133	189.488	2.06396	2.14752	2.23109	2.51133	2.56491	2.09828	2.21169	2.29129	2.35885	2.57379	2.47296	2.28346	2.01605	2.19009	2.04295	2.42355	2.61443	2.40101	2.71171	2.32134	2.89968	2.49363	2.73359	2.32263
299.078	299.074	299.11	223.989	208.316	227.741	0.483491	0.435466	0.847162	1.68856	1.08875	0.848725	0.598995	0.787953	1.14991	1.44039	1.19435	0.859634	0.708569	1.56329	1.43879	2.42522	1.93027	1.15113	0.702968	0.543922	1.28823	0.907595	0.930003	0.636804
304.912	304.907	304.917	73.4855	67.2501	74.629	0.427095	0.465038	0.325598	0.294633	0.301092	0.294369	0.372337	0.420839	0.293255	0.195589	0.305094	0.293134	0.413757	0.290188	0.31216	0.232546	0.22602	0.313159	0.251502	0.384048	0.296737	0.244201	0.293322	0.276752
307.139	307.135	307.142	254.495	251.862	256.645	0.834679	0.772338	0.657882	0.995872	1.01731	0.807247	0.722703	0.757881	0.809752	0.874487	0.846644	0.818795	0.789881	0.759091	1.05803	0.816515	0.796667	0.786556	0.81032	0.896221	0.876366	0.813928	0.803552	0.890565
309.206	309.203	309.209	433.768	432.923	443.229	5.51643	5.67225	7.03518	6.08781	6.0857	6.81688	5.15388	5.9853	6.65346	6.39353	6.34878	6.1399	6.6965	6.03354	7.02291	6.96626	6.32246	7.35403	5.64137	6.18805	6.94231	6.07663	6.51896	6.65483
310.973	310.967	310.979	96.6642	96.1103	97.7253	0.173496	0.103626	0.044198	0.120478	0.13353	0.139173	0.098419	0.0625477	0.0323238	0.0963893	0.0887691	0.117773	0.0794027	0.139329	0.0609652	0.120283	0.130545	0.143617	0.101697	0.0952429	0.0844706	0.0737598	0.128971	0.152341
311.222	311.215	311.223	446.084	428.622	447.153	14.4761	15.8986	18.6387	17.4046	16.8903	18.5856	12.6468	17.2598	17.8569	16.6636	18.7878	19.6461	20.3024	20.5642	22.261	28.1599	26.502	24.6625	16.3183	14.7493	17.501	16.0888	17.8095	21.496
311.221	311.205	311.224	545.994	545.119	547.055	1.12755	1.18154	1.41491	1.55493	1.43853	1.47862	0.786799	1.03949	1.44674	1.30561	1.13622	1.24347	1.85122	1.8591	2.49139	2.38669	2.45869	2.36113	1.17353	0.980319	1.34519	1.22634	1.55301	1.65635
311.222	311.22	311.224	458.208	457.543	468.541	15.9197	17.5526	20.2318	18.4794	19.8581	25.4536	16.5904	16.7466	18.1048	18.4899	18.7567	17.854	19.7588	17.2011	17.8268	19.3088	16.3954	20.1369	17.3781	15.9224	17.5706	18.6048	20.4478	17.9877
313.231	313.225	313.239	459.02	457.233	470.006	0.557867	0.687019	0.775049	0.799404	0.790647	0.678435	0.524864	0.854031	0.692512	0.835525	0.769288	0.623975	0.891241	0.57107	0.678326	0.610465	0.549527	0.66197	0.686122	0.694627	0.585306	0.796187	0.830109	0.749307
315.072	315.069	315.073	196.916	183.543	207.284	6.86929	6.28882	7.92422	9.83762	9.89895	8.18004	7.17018	7.83216	9.48091	9.83286	15.7074	7.10189	6.17625	7.91897	6.56104	7.58009	8.35662	6.32629	10.13	8.43891	10.8112	8.5637	7.91716	7.42043
321.207	321.201	321.211	507.342	504.922	510.143	0.288659	0.295097	0.330124	0.520792	0.286693	0.399869	0.25559	0.295526	0.375997	0.49062	0.365902	0.384218	0.40913	0.361688	0.580685	0.549	0.675853	0.536555	0.364219	0.23308	0.323754	0.426582	0.541586	0.391314
323.185	323.182	323.19	378.021	374.272	380.426	0.540511	0.606824	0.775147	0.71241	0.685801	0.731063	0.475283	0.595754	0.764682	0.613027	0.728564	0.755743	0.858842	0.994092	0.708024	0.751982	0.583797	1.03806	0.697983	0.58455	0.701629	0.47364	0.633107	0.993555
323.194	323.185	323.214	415.442	393.532	424.637	0.37034	0.574978	0.699521	0.839633	0.833077	0.539708	0.493419	0.541645	0.658597	0.601573	0.633525	0.666259	0.895736	0.944809	0.528227	0.897555	0.637348	0.843889	0.693417	0.667225	0.628038	0.562787	0.772575	0.807199
323.219	323.194	323.222	498.66	493.857	504.399	0.688388	0.645891	1.0097	0.899248	0.963779	1.0319	0.497626	0.710971	0.948842	0.808645	0.658026	0.76666	1.30433	1.36041	1.33054	1.40593	1.16136	1.40196	0.742968	0.701747	0.953837	0.706517	0.784219	1.03412
327.217	327.215	327.219	396.242	395.687	396.729	10.7884	12.8963	21.103	14.0941	14.2896	18.5871	11.3684	18.2212	18.2096	15.9521	18.5933	18.1768	20.7275	19.9021	20.3066	22.6578	16.2725	22.7388	14.2685	15.2913	17.5884	13.5854	12.8059	24.9518
329.233	329.232	329.235	353.997	353.282	354.54	99.7359	99.1562	115.263	101.363	130.423	118.969	88.0809	97.0199	100.412	102.213	103.096	92.1394	106.026	102.845	92.6094	96.6186	97.1764	90.8996	99.625	92.9343	95.3669	92.9639	80.1309	92.2838
337.111	337.107	337.121	341.892	340.928	343.018	0.0891002	0.1523	0.20262	0.295272	0.31247	0.150875	0.230897	0.153145	0.211287	0.319784	0.179027	0.142494	0.197158	0.144744	0.202233	0.362985	0.323796	0.0731724	0.188813	0.237624	0.239881	0.347706	0.286698	0.0896326
339.215	339.197	339.22	415.703	403.984	423.422	0.379511	0.479619	0.858916	0.73683	0.678723	0.690908	0.305508	0.497066	0.605247	0.609293	0.598156	0.535604	0.629618	0.713634	0.7297	0.588482	0.61712	0.729862	0.517177	0.368715	0.744746	0.530875	0.485494	0.733277
339.232	339.229	339.234	560.731	555.776	567.125	1.19881	0	0.160615	1.05323	0.0419846	0.0176563	3.03587	0.0773508	0.0363119	0.121949	0.0353431	0.125753	0.649125	0.13591	1.42604	0.00162598	0.00212667	0.00383122	0.0635557	3.17182	0.00551894	0.108327	0	0.00899101
339.215	339.207	339.224	510.229	509.622	510.744	0.403322	0.456134	0.4903	0.500447	0.408515	0.49779	0.315785	0.335783	0.415264	0.452968	0.426146	0.446372	0.626518	0.851436	0.646969	0.687358	0.683016	0.885957	0.502783	0.392889	0.511762	0.386042	0.51356	0.635539
341.109	341.104	341.11	89.8869	80.4661	98.7108	88.0555	102.741	109.982	85.834	71.7596	73.16	111.38	106.43	111.503	99.4914	78.7518	67.3545	68.0192	81.6879	73.202	63.6748	62.9471	43.6718	89.3778	119.164	96.5791	96.9832	84.7428	43.3483
341.109	341.108	341.11	109.289	103.858	120.907	96.1262	120.541	108.663	105.762	89.9739	90.4847	109.27	86.1135	110.979	100.978	73.3129	83.3086	90.3134	87.1032	74.4198	71.1629	74.166	51.135	93.722	116.202	100.939	106.048	88.5142	51.4541
341.109	341.106	341.118	138.391	128.301	159.711	1.50395	2.07457	1.97851	1.45452	1.37835	0.986909	1.59853	1.97376	2.42309	1.97397	1.58144	0.999809	1.27764	1.69646	1.44504	1.25099	1.28339	0.836251	1.72831	2.3093	2.13045	2.61462	2.17368	0.877379
341.198	341.191	341.209	375.436	372.3	377.704	0.250202	0.35233	0.351419	0.348337	0.373064	0.342389	0.252052	0.326812	0.373933	0.294333	0.360107	0.397999	0.5626	0.547539	0.390252	0.415878	0.345799	0.598499	0.324902	0.312917	0.359112	0.216289	0.403787	0.535784
341.196	341.19	341.201	327.634	323.491	339.288	0.341279	0.304519	0.533115	0.355606	0.41746	0.550078	0.320126	0.390625	0.478195	0.495227	0.540818	0.420798	0.566415	0.49547	0.536843	0.65367	0.464161	0.659402	0.451179	0.308679	0.545956	0.379775	0.44478	0.60097
341.195	341.191	341.198	301.509	300.291	302.715	0.116798	0.128442	0.210972	0.246238	0.25541	0.244415	0.159595	0.198002	0.145903	0.214412	0.233707	0.14283	0.191481	0.152278	0.205461	0.236684	0.167005	0.186431	0.138212	0.187482	0.220438	0.233529	0.254952	0.18619
341.233	341.211	341.235	436.779	428.392	437.213	12.2582	12.6608	16.6355	16.7632	16.6024	15.4586	9.56405	11.3654	15.1622	13.2412	13.5967	13.125	15.8651	15.9224	18.628	17.4299	16.9084	19.0875	12.4864	10.2644	16.4437	11.995	13.8279	15.8387
343.212	343.197	343.216	298.815	279.802	301.811	0.641979	0.872986	1.18979	1.16694	1.19414	1.35911	0.884723	0.918079	0.989137	0.970105	1.07266	0.964994	1.05598	0.917598	0.982663	0.963178	0.905949	1.20349	0.851946	0.849575	0.98057	0.824623	0.959508	0.991116
343.248	343.237	343.25	411.43	410.92	419.586	9.98297	9.8244	12.0928	10.0543	11.9999	10.9292	9.30447	8.70464	9.52968	9.93144	10.1628	8.86062	10.5378	9.72834	9.33884	9.79487	9.67555	10.1591	9.07835	8.86816	9.52804	9.64599	9.84756	9.38442
347.022	347.016	347.029	95.6499	94.6397	96.3737	0.217283	0.194267	0.110135	0.0608613	0.197493	0.185747	0.249909	0.119942	0.129139	0.114064	0.131291	0.173908	0.164184	0.15489	0.129576	0.139719	0.121169	0.171545	0.211767	0.254086	0.180626	0.186987	0.191508	0.178722
351.13	351.088	351.135	192.08	189.92	195.97	0.579845	0.678841	0.882571	0.58785	0.4924	0.514601	0.484406	0.636081	0.847643	0.548602	0.471373	0.367778	0.640439	1.30149	1.30077	0.806617	0.733664	0.618521	0.461493	1.21033	1.2866	1.09564	0.713942	0.570158
353.197	353.192	353.204	381.843	366.066	384.431	0.778991	0.683882	1.2952	1.12628	0.814975	1.1454	0.425452	0.773411	1.07219	0.931211	0.824338	0.723391	1.08652	1.08047	1.26065	1.28833	1.08114	1.39289	0.693	0.485444	1.06559	0.623472	0.711119	1.17029
353.235	353.231	353.244	545.95	541.213	547.136	0.530274	0.648825	0.770656	0.793565	0.749473	0.696633	0.348598	0.534778	0.737091	0.625436	0.570242	0.66425	1.07935	0.952935	1.23227	1.25743	1.22496	1.32118	0.758391	0.508232	0.513088	0.528524	0.826301	0.878811
355.211	355.207	355.215	365.116	364.409	365.843	0.08447	0.129961	0.254951	0.235492	0.167609	0.152152	0.0300955	0.0862407	0.189356	0.153183	0.104116	0.118345	0.199128	0.172065	0.232752	0.225421	0.152868	0.26328	0.0909107	0.0322102	0.188488	0.109879	0.0842794	0.201271
357.098	357.095	357.106	371.829	371.019	379.42	0.0594155	0.0293166	0.0453543	0.197015	0.312178	0.0822491	0.113038	0.0545887	0.113025	0.392068	0.363312	0.10767	0.0930348	0.0652215	0.0996918	0.18198	0.258113	0.0953123	0.123672	0.141028	0.226267	0.371701	0.35918	0.0954345
359.184	359.179	359.189	478.71	478.13	488.556	0.235233	0.125084	0.447511	0.581973	0.469625	0.170473	0.344057	0.419136	0.433163	0.519278	0.42101	0.285316	0.387918	0.641921	0.630963	0.701534	0.811988	0.548602	0.338844	0.519349	0.548329	0.590614	0.491293	0.446869
363.213	363.207	363.215	437.064	436.503	437.686	0.0474698	0.0318767	0.133594	0.0626214	0.0903625	0.104432	0.0171767	0.0535677	0.0854869	0.107758	0.0783662	0.0833049	0.0858312	0.079265	0.127212	0.119545	0.141068	0.133142	0.0906745	0.043242	0.0805816	0.0705496	0.0713673	0.0854713
367.067	367.063	367.079	224.274	221.472	225.285	0.104816	0.10272	0.14886	0.259261	0.222639	0.150729	0.139875	0.134762	0.211891	0.30821	0.187758	0.170317	0.14697	0.321714	0.337207	0.477959	0.368918	0.276867	0.139333	0.0735104	0.256199	0.21344	0.185763	0.117264
367.104	367.102	367.11	88.8609	87.7307	89.6458	0.207838	0.12544	0.122972	0.0931877	0.0713554	0.0520719	0.183282	0.153166	0.0729033	0.113257	0.0746296	0.0768346	0.0738444	0.226728	0.0686327	0.099802	0.0310079	0.0409711	0.0993205	0.10568	0.29536	0.0729722	0.112916	0.0612347
367.112	367.11	367.121	192.166	182.427	196.477	0.137413	0.142791	0.23045	0.289358	0.161277	0.153599	0.115408	0.106834	0.219019	0.165341	0.116348	0.155318	0.158591	0.301532	0.239915	0.265175	0.277767	0.19686	0.127753	0.252987	0.345355	0.274003	0.22281	0.173585
368.811	368.806	368.818	101.414	97.9245	108.354	0.334068	0.216907	0.0954748	0.172728	0.226056	0.280806	0.198967	0.146663	0.107942	0.128023	0.215164	0.47523	0.392669	0.365904	0.324554	0.406917	0.440384	0.737763	0.284508	0.298612	0.167535	0.149239	0.280527	0.941152
369.212	369.187	369.227	381.584	368.073	397.947	0.433583	0.372654	0.493613	0.471469	0.544581	0.47093	0.333774	0.359907	0.401388	0.504821	0.406855	0.391047	0.378629	0.444066	0.400343	0.352718	0.390079	0.424835	0.417335	0.342022	0.462605	0.359579	0.395536	0.427179
371.099	371.096	371.11	242.647	241.969	249.68	2.90746	2.4303	3.90681	4.90561	6.25836	3.9358	3.31658	3.71455	4.78298	5.1761	4.84818	4.30424	2.82018	4.35954	4.16602	5.30774	5.21707	3.98383	4.67195	4.00026	5.56246	4.66109	4.5455	3.98557
371.099	371.096	371.1	256.931	256.231	257.472	2.18532	2.33365	3.04224	3.45718	4.49921	3.01925	2.71446	3.67232	4.09646	4.59445	4.06375	2.90423	2.13749	3.373	3.16764	3.45673	3.74116	2.14091	3.25399	2.81382	4.20027	3.34404	2.96909	2.48235
371.117	371.111	371.128	249.32	247.264	250.529	0.062398	0.106229	0.141814	0.153477	0.227835	0.08787	0.0494994	0.0749851	0.120613	0.160162	0.137224	0.0864136	0.095508	0.130972	0.115508	0.165664	0.133123	0.126044	0.138984	0.0731708	0.162	0.122936	0.124967	0.139269
371.209	371.202	371.233	345.397	334.218	361.491	0.104964	0.210712	0.476338	0.370472	0.525387	0.391461	0.0410272	0.231277	0.442908	0.287957	0.280147	0.261338	0.485505	0.492415	0.703743	0.609871	0.437706	0.641457	0.187566	0.0579008	0.41717	0.136461	0.239899	0.323703
371.243	371.237	371.247	398.47	395.013	399.201	1.08527	1.09601	1.2859	1.12425	1.39118	1.26642	0.924513	0.895258	1.03008	1.13081	1.1258	0.963892	1.10166	0.986893	0.912482	0.882762	1.04993	0.962958	0.978323	0.929941	0.977201	1.05078	1.01085	0.951028
373.133	373.128	373.14	302.406	301.267	303.729	0.0665515	0.0438316	0.0940492	0.217703	0.296511	0.0966092	0.109913	0.0905173	0.143116	0.280492	0.205081	0.167622	0.140227	0.0530976	0.179469	0.322207	0.30924	0.154705	0.159421	0.109429	0.181675	0.267785	0.283412	0.134459
373.188	373.184	373.191	324.64	322.669	326.414	0.157321	0.226226	0.503867	0.268163	0.336971	0.456169	0.0141396	0.248418	0.377933	0.270262	0.257001	0.302402	0.365587	0.338071	0.475121	0.48268	0.366376	0.546141	0.191822	0.0412703	0.4185	0.134439	0.159169	0.435672
377.163	377.157	377.168	262.315	261.513	263.345	0.172816	0.165312	0.206916	0.223472	0.256195	0.1426	0.130733	0.128605	0.187686	0.184946	0.169336	0.174805	0.202749	0.180425	0.229995	0.216245	0.205039	0.232102	0.170327	0.164791	0.177763	0.198508	0.158718	0.185462
383.206	383.199	383.209	436.457	434.749	437.287	0.18918	0.150934	0.336537	0.410274	0.416452	0.298922	0.0135212	0.0895845	0.254935	0.254594	0.209101	0.270008	0.239794	0.360305	0.69725	0.591024	0.720113	0.734303	0.290257	0.0938845	0.318889	0.160938	0.273764	0.343538
385.115	385.112	385.118	221.164	219.327	221.908	1.50118	1.4416	1.29543	1.7037	1.9072	1.64143	1.66383	1.52513	1.65939	1.60215	1.72009	1.35954	1.36907	1.42144	1.56338	1.451	1.65164	1.60546	1.542	1.54326	1.67708	1.59651	1.6854	1.34642
385.258	385.255	385.26	464.8	448.834	465.104	0	0.032396	0.117731	0.102057	0.145627	0.0787548	0.0369997	0.0110956	0.097342	0.107976	0.155098	0.167962	0.0926212	0.0296267	0.0911084	0.167124	0.314481	0.161323	0.0539257	0	0.0362736	0.11584	0.252351	0.161067
387.096	387.09	387.102	265.721	250.547	266.54	0.12092	0.0712157	0.242298	0.204364	0.306089	0.222984	0.166583	0.153686	0.310689	0.29782	0.218748	0.176373	0.142037	0.238495	0.283527	0.496689	0.373862	0.193171	0.267489	0.168654	0.241453	0.264703	0.245732	0.178569
387.11	387.107	387.113	368.348	367.475	369.073	0.0114518	0.00266729	0.0220545	0.180303	0.263703	0.0341098	0.0460761	0.0148572	0.0488872	0.294211	0.455853	0.043454	0.0366481	0.0159581	0.0258187	0.14536	0.228627	0.0572553	0.0114736	0.0659908	0.0908163	0.332828	0.32467	0.0363895
387.115	387.113	387.116	89.3631	88.2392	98.6105	9.88684	12.2284	11.0269	9.14026	8.4206	8.31541	11.4194	10.3395	11.8256	9.72924	9.63274	6.77088	8.72958	8.47626	7.63109	7.04381	7.16032	4.64101	9.64262	12.0132	10.7691	11.5476	9.31119	4.74758
387.201	387.194	387.204	350.938	337.466	362.807	1.0521	1.23543	1.54485	1.5328	1.53794	1.45761	1.03966	1.22117	1.57546	1.45858	1.30172	1.05157	1.50657	1.41322	1.85207	1.56616	1.5615	1.74358	1.00756	0.755527	1.66856	0.916575	1.24181	1.51921
387.237	387.226	387.243	399.286	394.767	401.751	0.381718	0.349808	0.365157	0.570742	0.616104	0.378702	0.219605	0.273918	0.333159	0.479986	0.421617	0.324484	0.537209	0.513136	0.514131	0.487148	0.570203	0.531884	0.450212	0.297366	0.346145	0.376256	0.412885	0.434234
389.125	389.12	389.129	272.396	271.366	273.599	0.2463	0.249891	0.243283	0.291041	0.572143	0.307621	0.390809	0.262312	0.348205	0.31803	0.454726	0.378208	0.318269	0.260383	0.253534	0.439218	0.348761	0.254093	0.309305	0.364179	0.422284	0.504067	0.531619	0.424234
395.142	395.136	395.154	324.662	323.126	334.407	0.0510623	0.0499184	0.167392	0.0445723	0.0774649	0.0594416	0.104214	0.0751493	0.171352	0.0684863	0.0769266	0.136337	0.11389	0.0380163	0.164771	0.159246	0.164339	0.0710373	0.0781875	0.0337114	0.0504138	0.10411	0.0809743	0.103059
395.207	395.197	395.227	425.255	420.123	436.326	0.209183	0.183865	0.284738	0.290033	0.272141	0.319013	0.205057	0.209357	0.250794	0.22818	0.2728	0.236469	0.313096	0.217531	0.200491	0.238539	0.250641	0.237623	0.260438	0.184515	0.236308	0.239981	0.257389	0.257907
398.132	398.127	398.136	183.042	170.433	192.441	0.538678	0.82921	0.937606	0.954973	1.03251	0.664881	0.99268	0.887218	1.07515	1.04015	1.18818	0.442286	0.615259	0.545336	0.463554	0.447426	0.547254	0.393132	1.00738	0.952689	0.995	1.06725	0.733219	0.796589
399.101	399.092	399.107	215.315	213.826	227.949	0.279214	0.278314	0.555078	0.586772	0.760139	0.511985	0.201487	0.291803	0.82099	0.465684	0.45183	0.377833	0.26395	0.279762	0.382618	0.335214	0.337958	0.508358	0.526804	0.399964	1.09453	0.437189	0.739268	0.551565
399.134	399.13	399.135	184.039	182.098	191.606	0.0397998	0.0351568	0.103497	0.0893713	0.154995	0.0575022	0.0909557	0.0521257	0.0844869	0.0930141	0.11293	0.0138707	0.0495549	0.0275648	0.0256643	0.00625086	0.0371738	0.0223751	0.0990643	0.0834481	0.121069	0.0606569	0.0533234	0.051954
399.202	399.198	399.208	398.257	388.321	398.806	0.0358495	0.101025	0.1009	0.120551	0.134304	0.0823421	0.012405	0.039482	0.0737347	0.104774	0.0493263	0.0427873	0.0895281	0.0752882	0.134295	0.127631	0.144552	0.138023	0.0975469	0.053853	0.0678058	0.0460848	0.0542296	0.099706
400.955	400.951	400.96	95.4056	94.465	96.0706	0.266718	0.218051	0.121212	0.0928164	0.214217	0.256581	0.242566	0.153852	0.125903	0.13584	0.245261	0.240659	0.255649	0.175527	0.204679	0.273199	0.211576	0.278343	0.306799	0.226351	0.171071	0.198027	0.242407	0.26248
401.146	401.135	401.149	235.035	230.339	239.218	4.22881	3.61683	3.059	4.03847	4.56182	3.26355	3.14972	3.56618	3.24516	3.3992	4.4927	2.11847	2.16691	2.57645	2.21692	1.92241	2.8387	1.72715	3.09798	4.69694	4.23921	3.67918	2.48106	2.4733
409.087	409.083	409.093	88.7555	86.1126	90.8212	0.608839	0.733198	0.570845	0.435165	0.411948	0.379802	0.687188	0.558129	0.659424	0.521452	0.479923	0.397134	0.409345	0.512783	0.356401	0.364187	0.366801	0.205823	0.513583	0.619047	0.624712	0.612258	0.471624	0.192965
409.188	409.181	409.192	342.225	336.817	352.337	0.181939	0.0875046	0.242153	0.265385	0.312684	0.246594	0.0965334	0.098724	0.29366	0.215992	0.165652	0.30576	0.257405	0.170486	0.246857	0.322715	0.300518	0.317206	0.176474	0.103266	0.280296	0.22588	0.108726	0.252588
409.22	409.216	409.223	436.82	436.069	437.349	2.23267	2.232	2.65729	2.54811	2.59372	2.62247	1.85299	2.03408	2.4528	2.18705	2.39498	2.04897	2.57872	2.53513	2.83584	2.56358	2.72387	2.84975	2.25523	1.92053	2.63558	2.08206	2.28123	2.59188
421.117	421.106	421.135	225.197	223.657	237.022	0.267489	0.295114	0.307115	0.392106	0.409198	0.258226	0.316823	0.259496	0.352446	0.280534	0.345485	0.292663	0.289653	0.251805	0.310877	0.370481	0.342595	0.301679	0.240639	0.328642	0.428233	0.388116	0.434648	0.335233
423.202	423.198	423.208	416.842	404.8	432.808	0.692967	0.502423	0.64035	0.946653	0.731256	0.755538	0.569049	0.432983	0.804611	0.721672	0.780067	0.816615	1.27319	0.8762	1.05531	1.03043	1.19019	1.25078	0.740786	0.537098	0.764502	0.727407	0.772477	1.18548
427.086	427.081	427.094	201.047	199.33	207.284	0.148595	0.164143	0.136299	0.214834	0.219491	0.164665	0.168843	0.195377	0.16578	0.212356	0.174777	0.156067	0.15792	0.189664	0.178758	0.13876	0.187432	0.172343	0.216698	0.196449	0.305007	0.143334	0.143675	0.26593
431.15	431.141	431.158	221.157	208.822	222.552	0.280492	0.240941	0.316385	0.376194	0.45042	0.259986	0.299116	0.243329	0.413756	0.400397	0.429633	0.273436	0.241333	0.278645	0.230617	0.269456	0.309858	0.200952	0.319414	0.253241	0.426973	0.458703	0.309675	0.359418
431.192	431.186	431.196	237.942	237.098	239.062	0.17603	0.260942	0.338374	0.288142	0.354699	0.344896	0.270544	0.295172	0.369858	0.3414	0.331527	0.393388	0.342863	0.340603	0.678287	0.577375	0.488462	0.393077	0.342746	0.412159	0.337364	0.361719	0.388012	0.389455
439.087	439.082	439.093	242.758	241.827	243.523	0.359384	0.285065	0.48749	0.570356	0.698532	0.46674	0.447711	0.427466	0.529733	0.571272	0.542732	0.428868	0.326052	0.530716	0.480033	0.59053	0.536315	0.447348	0.54292	0.460263	0.609246	0.536665	0.462909	0.468048
440.922	440.917	440.929	93.8584	92.6356	94.3583	0.210365	0.246453	0.0990249	0.109269	0.173009	0.252666	0.159143	0.142398	0.11934	0.16712	0.189869	0.307067	0.232055	0.290977	0.278029	0.324315	0.268865	0.319829	0.229269	0.24545	0.122819	0.189657	0.226652	0.368217
445.141	445.136	445.183	224.768	220.498	232.704	0.0620802	0.0731408	0.0509127	0.118557	0.180671	0.137256	0.0797202	0.0633516	0.103945	0.108168	0.189258	0.0734714	0.0460803	0.0170439	0.0369041	0.0348046	0.0561948	0.0150609	0.0840657	0.0655577	0.0984404	0.104393	0.104369	0.0273776
447.151	447.148	447.154	234.745	230.629	235.763	6.61144	5.95837	4.75843	6.28643	7.37371	5.21218	4.90837	5.78998	5.40784	5.29993	7.34087	3.36386	3.33557	4.27007	3.36367	2.80012	4.42031	2.52118	4.7521	7.33298	6.69019	5.67257	3.98696	4.04754
455.098	455.093	455.106	222.552	220.537	223.974	0.334393	0.309486	0.368519	0.398455	0.578773	0.321416	0.384949	0.331358	0.385205	0.450808	0.44013	0.247486	0.379944	0.395971	0.264266	0.293628	0.375719	0.33613	0.461478	0.48294	0.45455	0.501226	0.404102	0.340996
458.961	458.955	458.964	95.6805	95.375	96.6329	0.101205	0.0668668	0.036112	0.0531864	0.127273	0.180451	0.113679	0.0726013	0.037198	0.0490499	0.0914009	0.0783913	0.0717602	0.0322977	0.0275706	0.0912705	0.0831709	0.104894	0.122243	0.0918447	0.074141	0.0628848	0.110875	0.0981826
459.196	459.194	459.198	515.89	514.485	516.689	0.0496038	0.00831176	0.0587982	0.161645	0.0881156	0.145115	0	0.0690961	0.0478477	0.121547	0.122094	0.111403	0.118314	0.0865134	0.229795	0.12399	0.240025	0.21843	0.118871	0.0383035	0.117119	0.121861	0.0266638	0.13504
461.167	461.162	461.175	201.44	198.432	207.776	0.667001	0.767457	0.697558	1.00942	0.920548	0.73545	0.830846	0.765803	0.81012	0.831726	0.937313	0.63009	0.545319	0.526018	0.467486	0.444671	0.570116	0.455945	0.909859	0.814192	0.928973	0.723072	0.761335	0.667694
471.076	471.073	471.079	88.8128	88.0248	89.9556	3.52904	4.39515	4.18687	2.8187	2.80932	2.56857	4.09566	3.54692	4.61769	3.49433	3.09216	2.87176	3.03023	2.98506	2.81785	2.50604	2.4746	1.43244	3.40027	4.25783	4.21947	4.13693	3.30128	1.60942
478.038	478.032	478.043	90.2601	89.2088	91.3347	0.342915	0.276964	0.344803	0.667412	0.253389	0.315266	0.304328	0.253879	0.324873	0.330197	0.266286	0.215468	0.168839	0.185578	0.175846	0.123782	0.193558	0.121622	0.197181	0.218019	0.269343	0.265595	0.247722	0.0960455
481.203	481.196	481.208	375.588	374.583	376.57	0.113349	0.116538	0.188488	0.144076	0.168479	0.239762	0.122223	0.175437	0.194258	0.180206	0.244035	0.198	0.217379	0.195774	0.224456	0.275429	0.20591	0.246501	0.0960971	0.0353277	0.180661	0.187415	0.138772	0.194077
487.131	487.127	487.136	137.473	135.178	155.941	0.0616249	0.00710801	0.178069	0.0984417	0.14229	0.0429237	0.0125736	0.0554655	0.214583	0.078579	0.0454396	0.0318241	0.0387823	0.113841	0.0649477	0.0906451	0.101402	0.196214	0.215921	0.0503496	0.313474	0.0539789	0.147163	0.107778
488.068	488.061	488.081	89.5156	88.2075	91.0246	0.501302	0.592984	0.630639	0.876874	0.538204	0.427883	0.639121	0.451754	0.608911	0.608234	0.454061	0.40579	0.383906	0.374029	0.381066	0.267014	0.298224	0.235059	0.548194	0.651304	0.535406	0.515003	0.482969	0.161918
488.163	488.154	488.169	95.9508	90.5675	107.515	0.37983	0.422521	0.37999	0.483599	0.18888	0.155687	0.408615	0.620561	0.395811	0.28367	0.20884	0.115635	0.162179	0.126303	0.154657	0.139446	0.0941537	0.0314182	0.331635	0.333275	0.327542	0.230582	0.134982	0.0257221
491.138	491.121	491.146	224.774	223.997	231.187	0.0701942	0.0958453	0.132568	0.209069	0.276565	0.127278	0.115927	0.111257	0.169038	0.21545	0.237804	0.139527	0.0961065	0.144223	0.128058	0.194758	0.289124	0.120438	0.168774	0.100088	0.213307	0.220902	0.244393	0.127753
494.192	494.19	494.196	242.303	241.446	242.952	0	0	0	0.0818572	0	0.35114	0	0.186465	0.200674	0.136367	0.125197	0.450148	0	0.0026535	0.034022	0.164282	0.482237	0.268979	0	0.0298693	0.0104018	0.0747046	0.10122	0.193568
497.13	497.124	497.139	225.074	223.426	226.002	0.300662	0.268706	0.243136	0.429043	0.565217	0.303278	0.347791	0.301474	0.314426	0.474693	0.509899	0.276893	0.324957	0.309759	0.286454	0.327951	0.348797	0.213898	0.340953	0.377684	0.330057	0.538233	0.363679	0.305863
498.223	498.217	498.227	212.238	209.866	215.077	0	0	0	0.250632	0	0.90554	0	0.458378	0.443082	0.435621	0.3189	0.878214	0.00361928	0.0915931	0.0881642	0.477638	1.13761	0.634658	0.0177258	0.141306	0.0804718	0.272397	0.225669	0.345748
501.131	501.126	501.141	208.712	206.501	212.473	0.554247	0.324107	0.811277	0.65766	0.610398	0.537259	0.372114	0.514163	0.894663	0.645334	0.484399	0.514297	0.495098	0.66859	0.702329	0.622799	0.574477	0.906874	0.989462	0.736213	1.34414	0.731831	0.82903	0.86348
507.151	507.147	507.156	248.143	247.226	249.123	0.633658	0.755923	0.699793	0.968594	1.09124	0.765558	0.744428	0.659747	0.923955	0.93236	0.895231	0.820945	0.761634	0.730239	0.99097	1.13469	1.09158	0.652334	0.855152	0.835194	0.937886	1.02629	0.891804	0.713824
515.141	515.135	515.149	210.226	208.07	214.32	0.205886	0.185206	0.207971	0.390713	0.28462	0.239621	0.258413	0.199262	0.257446	0.380142	0.379522	0.280339	0.278895	0.193409	0.31354	0.346568	0.284176	0.220776	0.240944	0.170428	0.259247	0.378717	0.298149	0.256015
523.235	523.226	523.24	280.717	279.789	281.94	0.0645478	0.0959164	0.177963	0.139906	0.178338	0.0934257	0.120192	0.157629	0.165624	0.140887	0.114785	0.0987968	0.139971	0.0511674	0.1562	0.101791	0.086306	0.146954	0.142159	0.100131	0.0984216	0.116053	0.164165	0.150596
524.195	524.188	524.202	332.834	331.994	333.681	0.117162	0.0866809	0.175944	0.213521	0.258396	0.179186	0.151369	0.202451	0.242844	0.266056	0.311311	0.257858	0.125362	0.142222	0.106903	0.166258	0.26702	0.154663	0.169971	0.10554	0.19072	0.245357	0.313504	0.267074
526.114	526.11	526.121	89.079	88.1449	90.3259	0.266372	0.220677	0.2267	0.221929	0.135552	0.107302	0.302444	0.235944	0.258022	0.180946	0.124012	0.0677063	0.0904088	0.133111	0.133387	0.0625248	0.0994516	0.0340858	0.190133	0.182946	0.201861	0.171806	0.145347	0.0141333
526.157	526.151	526.159	229.528	228.674	230.032	0.0389702	0.0967643	0.060573	0.132839	0.244365	0.0660495	0.0953439	0.0822958	0.124471	0.0639403	0.181763	0.0382144	0.0931283	0.0838157	0.0696253	0.0521098	0.0940938	0.0786991	0.163507	0.115326	0.180764	0.191017	0.0826629	0.121858
527.138	527.13	527.142	105.857	86.3306	114.981	6.71781	9.70224	7.3323	10.1446	8.86789	5.50043	6.65074	7.54202	7.61007	7.90542	6.34814	4.95412	5.8668	5.78213	5.0212	4.11283	3.29915	2.50542	6.43562	5.65415	5.80828	6.37982	4.71638	3.20736
529.2	529.195	529.206	558.841	557.815	559.523	0.0309716	0.00925008	0.0943491	0.0815716	0.0644452	0.109972	0	0.0428522	0.0726516	0.0522162	0.0531266	0.0821908	0.143714	0.134634	0.218164	0.197731	0.195947	0.225947	0.0559169	0	0.0742901	0.0554209	0.050062	0.115123
535.037	535.032	535.044	103.392	99.7209	113.523	0.411948	0.500262	0.12799	0.597116	0.377089	0.382206	0.540741	0.429882	0.147296	0.456634	0.512682	0.393315	0.537322	0.30845	0.285428	0.359572	0.439536	0.160068	0.160499	0.384537	0.143598	0.504874	0.157763	0.23676
535.193	535.186	535.2	244.746	243.237	249.715	0.189651	0.241826	0.161866	0.236777	0.348958	0.176969	0.220817	0.202728	0.161037	0.268213	0.262232	0.190942	0.23633	0.199252	0.210793	0.214316	0.165299	0.310916	0.219607	0.1718	0.244086	0.338311	0.286068	0.261066
558.064	558.056	558.069	128.179	122.098	130.199	0.734038	0.943885	0.0272501	0.671135	0.461508	0.740351	0.916772	0.799518	0.198871	0.534543	0.488364	0.710516	0.848455	0.606403	0.322245	0.473884	0.371682	0.372345	0.49729	0.572515	0.31072	0.329542	0.210874	0.363664
580.325	580.318	580.329	435.924	435.256	441.951	0.16933	0.126834	0.138889	0.141713	0.204915	0.196221	0.200475	0.126905	0.171105	0.17553	0.164904	0.192675	0.310129	0.230909	0.280241	0.280886	0.390227	0.280923	0.204542	0.0879084	0.181504	0.185375	0.247319	0.316767
614.9	614.893	614.907	71.6262	71.1394	72.2934	0.82567	0.54491	0.453962	0.652665	0.54773	0.680138	0.723687	0.357962	0.606906	0.542201	0.562083	0.575794	0.470741	0.411871	0.366287	0.512937	0.460766	0.496404	0.535694	0.49227	0.651438	0.44341	0.712133	0.605785
615.221	615.217	615.231	244.326	242.593	254.358	0.0214372	0.0918114	0.053584	0.169946	0.192036	0.161979	0.0994167	0.127747	0.197388	0.193564	0.246378	0.181743	0.181414	0.202007	0.180691	0.188436	0.177863	0.183416	0.260102	0.0923425	0.267163	0.198232	0.320335	0.181895
615.9	615.893	615.904	71.6508	71.0674	72.2988	0.596945	0.331954	0.332558	0.477309	0.383185	0.47551	0.566001	0.26914	0.45787	0.400847	0.422992	0.398477	0.329298	0.278253	0.271232	0.36052	0.329943	0.38666	0.373376	0.394247	0.488093	0.338523	0.506898	0.427798
616.898	616.892	616.904	71.6495	71.0676	72.1876	0.810555	0.494928	0.45781	0.60458	0.525315	0.622806	0.80907	0.38338	0.602888	0.57402	0.590263	0.595858	0.451371	0.39137	0.35833	0.487715	0.48351	0.534157	0.529036	0.553169	0.635009	0.45141	0.704919	0.542396
617.898	617.894	617.905	71.5884	70.9429	72.795	0.389882	0.203771	0.217609	0.301228	0.275023	0.311585	0.372783	0.154254	0.269861	0.287306	0.290381	0.293627	0.190097	0.165668	0.144475	0.235677	0.255059	0.244652	0.232865	0.178694	0.292092	0.234169	0.339638	0.26174
623.452	623.447	623.457	486.783	486.264	487.143	0.0264957	0.0347173	0.128639	0.0550908	0.076016	0.119973	0	0.0673078	0.0965386	0.0783801	0.143352	0.123854	0.103658	0.158173	0.213064	0.321194	0.173315	0.277461	0.0254137	0	0.10303	0.0553901	0	0.189363
638.685	638.675	638.692	81.0786	78.9136	82.3876	0.202545	0.266447	0.262054	0.278772	0.253435	0.24556	0.215137	0.273122	0.27472	0.232846	0.30719	0.176484	0.290832	0.25262	0.270474	0.209936	0.267075	0.21556	0.306018	0.296715	0.256322	0.303907	0.267822	0.258381
641.403	641.396	641.409	492.771	492.343	493.105	0.0368549	0.027686	0.357191	0.03936	0.0751194	0.105807	0.0509693	0.0922564	0.128429	0.0129609	0.0915099	0.0307831	0.0713792	0.0552479	0.0181083	0.0700598	0.0500668	0.0783786	0.0119875	0.0284765	0.0500871	0.094063	0.0632074	0.0595032
645.435	645.424	645.441	486.843	486.376	487.306	0.218212	0.201842	0.621897	0.275774	0.331133	0.553617	0.0397539	0.40591	0.473271	0.354141	0.579235	0.46835	0.546247	0.61488	0.92376	1.25083	0.789494	1.17384	0.191497	0.0568728	0.481512	0.329363	0.123981	0.763435
645.434	645.425	645.44	530.667	530.3	531.176	0.136045	0.155423	0.764787	0.0872522	0.163554	0.250195	0.0983681	0.267018	0.335019	0.128385	0.258436	0.149799	0.23295	0.202477	0.0948705	0.28586	0.191254	0.210478	0.0720283	0.0316705	0.156073	0.246648	0.162869	0.17096
647.451	647.447	647.46	447.654	447.09	448.102	0.139374	0.104984	0.168615	0.208932	0.187921	0.204153	0.0503684	0.118357	0.14854	0.143072	0.140675	0.16387	0.241263	0.188096	0.263542	0.218701	0.216305	0.276594	0.11094	0.0583044	0.153785	0.14652	0.172721	0.122801
657.434	657.429	657.439	446.881	446.367	447.349	0.155314	0.129434	0.206916	0.219413	0.159508	0.237637	0.0403505	0.149193	0.220682	0.206826	0.178881	0.234772	0.284551	0.21695	0.305864	0.305192	0.281209	0.352232	0.118246	0.0698773	0.177061	0.158375	0.189492	0.248153
672.983	672.971	672.991	99.9786	95.8886	105.91	0.419806	0.326052	0.239278	0.291186	0.337869	0.465363	0.207702	0.290824	0.241614	0.328451	0.410759	0.51774	0.438086	0.400569	0.368609	0.390376	0.360682	0.473317	0.418604	0.358635	0.332037	0.34131	0.467809	0.486634
673.396	673.389	673.402	436.829	436.355	437.327	0	0.00272794	0.0679481	0.0320373	0.0348347	0.0446405	0	0.0342499	0.0570538	0.0596976	0.0758107	0.0837843	0.10965	0.0845544	0.0804777	0.110703	0.0711494	0.16489	0.0149259	0	0.0738245	0.0256386	0.0136895	0.12742
673.429	673.423	673.435	487.85	487.253	488.314	0.123892	0.106915	0.288162	0.184045	0.209881	0.24175	0.0668061	0.14864	0.31884	0.197888	0.196488	0.276221	0.353233	0.314643	0.433839	0.490889	0.411444	0.676325	0.135554	0.0449801	0.287001	0.175272	0.150825	0.400317
681.456	681.449	681.46	353.977	353.062	354.54	1.74489	1.35495	2.19071	1.88755	2.91708	2.38503	1.32136	1.64063	1.99007	1.94528	1.95028	1.71408	2.09025	1.82035	1.83368	1.81249	1.9834	1.75913	1.81894	1.30362	1.64571	1.79021	1.18172	1.63539
683.225	683.221	683.228	110.299	103.907	119.013	6.24579	9.16187	8.84844	8.65614	7.53422	4.82139	8.14916	9.29134	11.8397	9.941	5.66312	5.60079	6.02107	4.20246	6.05671	4.10813	4.8427	2.31383	5.78408	8.07262	9.03571	9.2286	6.01634	2.27217
683.225	683.219	683.229	90.3585	89.2664	97.6473	4.13289	4.43267	5.67667	7.16426	2.96325	2.78649	4.88305	7.46846	5.72248	5.04613	3.95839	2.69513	2.478	2.8063	2.13468	3.3939	2.4009	0.96442	3.09341	4.09777	5.68265	5.18641	3.60423	1.13889
689.424	689.418	689.428	436.709	436.377	437.022	0.0307414	0.0333045	0.145906	0.10255	0.110004	0.0924841	0	0.0440199	0.12017	0.0953928	0.0853985	0.111106	0.122918	0.116989	0.146861	0.150087	0.131584	0.211343	0.0247693	0	0.11941	0.0666561	0.0607008	0.154363
719.202	719.195	719.21	98.0796	89.3157	112.197	0.951319	1.2262	1.16033	1.01717	0.923591	0.522903	1.22474	1.08703	1.27537	1.08054	0.94598	0.616676	0.66306	0.679729	0.784857	0.515892	0.612511	0.375931	0.780331	1.07459	1.05747	1.03835	0.801947	0.30192
721.199	721.191	721.205	98.0433	90.1153	109.147	0.30328	0.37029	0.381047	0.339855	0.3171	0.0874644	0.3802	0.311685	0.498611	0.314651	0.252942	0.147082	0.215065	0.166026	0.263813	0.161737	0.223066	0.0677394	0.250798	0.282184	0.353639	0.42203	0.304351	0.075739
749.443	749.438	749.45	354.116	353.377	354.734	0.318598	0.240997	0.308212	0.287987	0.42026	0.369973	0.24735	0.280895	0.327807	0.35142	0.341258	0.292956	0.376126	0.311926	0.292251	0.332185	0.358853	0.295209	0.282617	0.218959	0.276927	0.312789	0.173293	0.277373
767.186	767.18	767.193	89.4622	88.6323	90.3708	0.468406	0.544237	0.553314	0.572529	0.306012	0.255789	0.533937	0.54796	0.725996	0.509152	0.372149	0.351629	0.295637	0.270508	0.277506	0.332558	0.300252	0.0754526	0.381913	0.421546	0.612656	0.574723	0.363127	0.0947157
781.196	781.19	781.202	104.21	94.3985	120.607	5.8391	7.55467	7.73171	6.70665	6.89779	4.4336	6.23819	5.57938	8.72236	8.81442	7.31282	5.95478	6.39027	4.22193	5.58636	4.55789	4.36175	2.47547	5.55669	6.44548	7.55777	8.94054	6.24316	2.11987

## Sheet: Oscillating transcripts
Raw intensities were normalized using the 75th percentile value and log2 and baseline transformed prior statistical analysis.
sys, systemic leaves; leaves, treated leaves, c, Control; os, W+OS (see materials and methods)
PrimaryAccession	sys_1h_c_1.txt:gProcessedSignal(normalized)	Syst_1h_c_2.txt:gProcessedSignal(normalized)	sys_1h_c_3.txt:gProcessedSignal(normalized)	sys_1h_os_4.txt:gProcessedSignal(normalized)	sys_1h_os_5.txt:gProcessedSignal(normalized)	sys_1h_os_6.txt:gProcessedSignal(normalized)	leaves_1h_c_1.txt:gProcessedSignal(normalized)	Leaves_1h_c_2.txt:gProcessedSignal(normalized)	leaves_1h_c_3.txt:gProcessedSignal(normalized)	leaves_1h_os_1.txt:gProcessedSignal(normalized)	leaves_1h_os_2.txt:gProcessedSignal(normalized)	leaves_1h_os_3.txt:gProcessedSignal(normalized)	root_1h_c_1.txt:gProcessedSignal(normalized)	root_1h_c_2_GL.txt:gProcessedSignal(normalized)	root_1h_c_3.txt:gProcessedSignal(normalized)	root_1h_os_1.txt:gProcessedSignal(normalized)	root_1h_os_2.txt:gProcessedSignal(normalized)	root_1h_os_3.txt:gProcessedSignal(normalized)	sys_5h_c_1.txt:gProcessedSignal(normalized)	sys_5h_c_2.txt:gProcessedSignal(normalized)	sys_5h_c_3.txt:gProcessedSignal(normalized)	sys_5h_os_1.txt:gProcessedSignal(normalized)	sys_5h_os_2.txt:gProcessedSignal(normalized)	sys_5h_os_3.txt:gProcessedSignal(normalized)	leaves_5h_c_1.txt:gProcessedSignal(normalized)	leaves_5h_c_2.txt:gProcessedSignal(normalized)	leaves_5h_c_3.txt:gProcessedSignal(normalized)	leaves_5h_os_1.txt:gProcessedSignal(normalized)	leaves_5h_os_2.txt:gProcessedSignal(normalized)	leaves_5h_os_3.txt:gProcessedSignal(normalized)	root_5h_c_1.txt:gProcessedSignal(normalized)	root_5h_c_2.txt:gProcessedSignal(normalized)	root_5h_c_3.txt:gProcessedSignal(normalized)	root_5h_OS_1_techincalReplicate.txt:gProcessedSignal(normalized)	root_5h_os_2.txt:gProcessedSignal(normalized)	root_5h_os_3.txt:gProcessedSignal(normalized)	sys_9h_c_1.txt:gProcessedSignal(normalized)	sys_9h_c_2.txt:gProcessedSignal(normalized)	sys_9h_c_3.txt:gProcessedSignal(normalized)	sys_9h_os_1.txt:gProcessedSignal(normalized)	sys_9h_os_2.txt:gProcessedSignal(normalized)	sys_9h_os_3.txt:gProcessedSignal(normalized)	leaves_9h_c_1.txt:gProcessedSignal(normalized)	leaves_9h_c_2.txt:gProcessedSignal(normalized)	leaves_9h_c_3.txt:gProcessedSignal(normalized)	leaves_9h_os_1_GL.txt:gProcessedSignal(normalized)	leaves_9h_os_2.txt:gProcessedSignal(normalized)	leaves_9h_os_3.txt:gProcessedSignal(normalized)	root_9h_c_1.txt:gProcessedSignal(normalized)
Na_454_03214	1.04652	-0.122571	-0.856253	0.471617	0.549268	0.036206	1.71753	1.62112	0.790316	2.77702	1.7324	1.694	-1.04517	-1.76619	-2.43449	-0.584349	-1.87664	-2.84057	-2.48849	-0.0806873	-2.14438	-0.406848	-2.31526	-3.25859	-0.410629	0.927684	0.299634	0.573928	-0.481656	-0.695214	-3.72778	-1.20141	-2.73483	-2.51628	-4.10333	-3.52319	-1.31511	-0.461626	1.0255	-0.95755	-0.385103	-0.64895	-0.036206	0.588653	1.27265	-0.773682	0.0478604	0.601064	-1.94123
Na_454_06724	-1.16648	-1.14471	-1.32514	-1.28751	-1.6465	-1.50017	-1.49252	-1.54393	-1.47314	1.03867	1.63252	1.48006	-0.321197	-0.621984	-0.706021	0.181597	0.101434	0.311209	-2.37784	-1.20504	-1.61007	-0.646819	-1.67229	-1.42717	-2.19075	-1.36388	-2.50417	0.0872865	-0.601448	-0.558498	-0.718003	-0.42572	-0.500914	-0.889187	-0.909941	-1.06061	0.0388117	-0.937303	0.550379	0.213965	0.486526	0.210282	-0.0817809	-0.206242	0.617446	0.198875	0.216233	-0.241945	-1.77757
Na_454_08612	-0.657644	-1.00664	-0.8811	-1.0305	-1.0037	-0.793297	0.0233004	0.347672	-0.195994	-1.7341	-1.4498	-0.802218	-5.29324	-5.75706	-5.19341	-4.71048	-4.94015	-4.68298	2.08854	1.66103	1.73599	0.379521	0.656422	0.336679	2.84987	2.54059	2.83286	1.20468	1.32979	1.2052	-5.13761	-5.55123	-5.36333	-6.91781	-7.20123	-5.89391	1.77414	1.03888	1.93532	1.31996	1.70646	1.30198	2.68088	2.65075	2.69241	2.25766	2.27958	2.29948	-5.49646
Na_454_10779	-0.440947	-0.596036	-0.893257	-1.11875	-1.03049	-1.17175	-0.825996	-0.780697	-1.26744	1.47315	1.68275	1.34338	-0.50169	-0.289876	-0.447443	-0.498412	-0.455002	-0.266616	-1.62026	-1.07584	-1.49005	-0.884017	-1.05246	-1.31797	-1.97021	-1.5376	-1.81389	0.151155	-0.152012	-0.316756	-0.833137	-0.791642	-1.22085	-0.996972	-0.847206	-0.751494	0.0850916	0.252748	0.571293	0.131925	0.649859	0.177799	0.435695	0.608387	1.02099	-0.177866	0.381109	-0.094698	-0.69345
Na_454_35633	-0.833122	-1.14913	-0.0241766	-1.14132	-0.831527	0.190035	-0.562174	-0.0787993	-0.233759	0.219409	-1.01009	-1.46397	-2.59088	-2.01655	-1.15115	-1.29039	-1.37784	-1.19394	0.189091	0.862742	1.73141	0.167676	-0.970444	-0.14997	2.59687	1.90517	1.94012	1.37481	0.786506	0.124442	-1.7335	-2.85411	-1.06573	-1.79047	-1.47783	-1.52568	1.82994	-0.548495	1.59021	0.417036	1.43972	0.912991	2.44718	2.15877	2.69523	1.57766	2.2664	1.15485	-1.17041
Na_454_12641	-0.670693	-0.455535	0.610083	-0.00891638	0.578391	0.552496	-0.875722	-1.31077	-1.48888	-0.340382	-1.74002	-1.7857	1.1544	0.991075	1.31832	0.866588	1.29019	1.3268	0.446439	-2.63805	-0.338391	-0.462514	-0.00593138	-0.30521	-0.623627	-1.97942	-0.761137	-0.827127	-2.98355	-2.03693	1.45444	1.13494	1.49238	2.12887	2.16508	1.78044	-1.49696	-0.709764	-1.95962	-1.07413	-1.12461	-1.38091	-1.14326	-1.70281	-1.91599	-2.11705	-2.94284	-2.26274	1.17455
Na_454_41936	1.21671	1.36137	1.99964	1.3531	1.22357	1.78464	-0.653024	-0.212634	-0.267384	0.773488	0.162967	-0.837629	-1.9928	-1.42161	-1.02255	-1.16962	-2.06839	-1.7163	1.59238	2.12137	1.087	1.77427	0.737794	1.16465	-0.600495	0.379416	-1.24262	0.32738	-0.25743	1.25373	-2.27167	-2.25121	-2.37134	-1.54046	-1.20977	-0.92888	1.79606	1.25044	1.99391	1.56692	2.17532	1.69	0.23487	-0.469111	-0.698374	0.802515	0.368198	1.46191	-0.576818
Na_454_01065	-0.624528	-0.78606	-0.807743	-0.847289	-0.974647	-1.32258	-0.271049	-0.94576	-1.056	-0.417099	-0.145634	0.0077939	1.97909	1.67961	1.68491	2.18313	1.68275	1.42479	-1.00988	-1.38176	-0.714409	0.260396	-1.41179	-0.83619	-0.443073	-0.477149	-0.590527	1.01874	-0.246496	0.0597172	1.79361	1.25623	2.11071	1.83903	1.17262	1.0954	-0.526339	-1.23798	-0.291126	-0.186707	-0.552672	-0.304946	0.0591359	-0.760795	-0.346975	-0.0077939	0.0227132	-0.333142	0.120833
Na_454_05247	-1.29886	-1.06859	-1.15466	-1.35972	-1.16685	-1.07111	-1.13437	-1.09673	-1.10539	-0.530599	-0.487999	-0.796139	0.0964108	-0.0360136	-0.370061	0.284694	0.244449	-0.0800762	-0.709917	-0.968326	-0.76405	-0.126179	-0.454009	-0.452608	-0.686499	-0.568054	-0.521241	0.819272	0.69566	0.725118	0.0474911	0.345238	0.0208321	-0.134823	-0.209706	-0.307035	-0.521397	-0.366998	-0.284213	-0.481789	-0.578529	-0.57335	-0.196314	-0.30953	-0.334573	0.731794	0.968919	0.938089	-0.0316792
Na_454_16634	0.288201	-0.204974	-0.0381072	0.513407	0.192698	-0.585835	1.12469	1.17829	0.895363	2.29122	1.22212	0.820921	-1.99906	-1.83928	-1.90766	-1.06576	-0.709737	-0.945492	-0.393936	1.008	-0.587796	-0.768962	-0.210133	-0.515139	0.620341	1.71027	-0.410543	-1.84647	-4.00159	-3.92702	-1.18994	-2.0355	-1.02606	-3.45622	-1.67005	-2.22284	1.27007	0.688301	1.71943	0.516489	0.672122	0.261179	0.711579	1.09348	1.35059	-2.28967	-0.676205	-1.66316	-2.00937
Na_454_28050	0.674319	1.25405	1.23574	0.874578	0.953842	1.47677	-0.202965	0.222828	-0.0151722	-3.23859	-2.37849	-1.58071	-5.51945	-6.12624	-6.69588	-5.33523	-6.54664	-2.30173	0.530108	0.0404332	0.106434	-1.01848	-0.256352	0.284132	0.159883	-0.800992	-0.657216	0.922086	1.34652	1.28736	-5.45125	-5.8141	-5.42366	-5.45155	-5.3256	-4.19206	-0.481498	-0.169087	-1.4986	-0.923798	-1.48242	-0.721807	-0.69149	-0.797569	-1.01057	0.0151722	0.317478	0.208678	-6.19468
Na_454_14081	1.37909	-0.223854	-0.133409	2.03513	0.323136	1.37047	2.50067	1.85038	2.74622	1.11368	0.735277	1.32282	-1.74112	-1.32735	-0.862615	-0.87348	-1.71593	-1.52017	0.447752	1.733	2.52771	0.998541	-0.764094	0.07829	3.37452	2.89446	2.80551	0.635388	-0.506435	-0.840583	-2.03854	-1.97851	-2.13008	-1.22694	-0.878185	-0.284024	0.751928	0.0726757	1.19739	1.02238	0.227618	0.648538	0.875305	1.04026	1.99163	0.429559	0.927901	-0.314811	-0.00970554
Na_454_18724	2.30261	1.5937	1.35639	2.10694	1.62085	1.57278	3.11079	2.8146	2.56189	1.2571	1.63053	2.2391	-5.56796	-5.17365	-4.62686	-4.71114	-5.5625	-5.40001	1.91251	2.71046	2.64373	0.463025	0.943098	1.26369	4.05733	3.69507	3.33849	1.01422	-0.0323598	0.461707	-4.62029	-5.84964	-5.98189	-5.12742	-4.73787	-4.55304	1.80067	0.399837	1.75319	1.17709	1.18852	0.915322	2.21586	2.09614	2.54336	1.62477	1.90007	1.2624	-4.18457
Na_454_20797	4.54117	4.39968	4.27008	4.43649	4.74159	3.94583	4.96554	5.39755	5.04867	4.18179	3.87131	3.9843	-2.97493	-2.89699	-3.75269	-1.0446	-2.70998	-1.66061	5.29338	5.44096	5.48248	4.8259	5.32114	4.65934	6.52609	6.0189	6.48031	5.88802	5.60005	5.08988	-1.87984	-1.52367	-1.50249	-2.85225	-3.77683	-2.05687	2.77829	2.36774	2.81432	2.72139	2.64543	2.5713	3.29813	2.77478	3.18504	3.62969	4.46405	3.75112	-2.80044
Na_454_22181	1.97551	1.27414	1.14344	1.48782	1.73721	1.46345	2.72276	2.5564	2.24841	0.59244	1.09854	1.88068	-9.04421	-8.69504	-8.20939	-8.24962	-9.09919	-8.92205	2.55797	2.24834	2.27452	0.722241	0.998818	1.18962	3.46124	3.14048	3.3642	0.341954	0.262532	0.612561	-9.36521	-9.37645	-8.22032	-8.56517	-6.27286	-8.01699	1.4061	1.16873	1.38711	0.823276	0.869616	0.678944	2.19115	2.15815	2.19312	1.39767	1.25069	1.41316	-7.65384
Na_454_34221	4.43545	4.17226	4.14813	4.7113	4.15974	4.12069	4.70056	4.69658	4.53481	3.38758	3.4865	3.29638	-1.55118	-1.05151	-0.728463	-0.660628	-1.69042	0.0349312	4.34056	5.36083	5.35129	5.40778	5.14404	4.47783	6.0437	5.83061	5.76622	6.02919	5.46531	5.32563	-1.86485	-1.86222	-1.17756	-1.16084	-0.804012	-0.494503	2.81335	1.41513	3.13634	2.84179	2.71672	2.97569	2.79724	2.97114	3.26567	4.13593	4.93782	3.89295	-0.1874
Na_454_39081	1.44833	0.584752	1.48034	1.8476	3.04046	2.40109	2.30304	3.23439	2.80966	1.46776	1.73134	2.184	-1.30082	-0.921171	-0.402631	-0.49495	-1.39752	-1.22204	4.42829	3.09041	3.3281	2.52441	3.21063	2.32574	4.87979	4.36109	4.6586	1.337	2.54588	2.68833	-1.66243	-1.69228	-1.78055	-0.931229	-0.541448	-0.337277	0.232344	0.468976	-0.169887	0.653904	0.569306	0.409401	0.620894	0.211323	-0.13749	0.687056	-0.399732	0.750367	0.0146403
Na_454_00622	1.63426	1.29692	1.26437	1.14614	1.15539	0.536747	1.49013	1.22863	1.68073	0.599721	1.14333	1.3491	-2.46605	-2.46014	-2.28496	-1.71092	-2.10183	-2.10973	2.84929	2.60623	2.29634	0.933543	1.26827	1.70482	3.15267	3.15726	2.96	1.33708	1.30508	1.72341	-2.56829	-1.95464	-1.71849	-2.72179	-2.9097	-2.64227	1.5668	1.10548	1.37521	1.45715	1.14515	1.18926	1.45987	1.19773	1.13799	2.10087	1.73078	1.81684	-3.52773
Na_454_11568	-0.091397	0.613422	0.0775197	0.0927722	1.12996	1.378	0.663937	0.535114	-0.439585	-1.61492	-0.770724	-1.08662	-5.42718	-4.37809	-4.66915	-4.80511	-4.70964	-5.28462	1.49872	0.707307	0.629114	-0.452146	-0.72371	-1.42942	1.17695	1.40486	1.61315	-0.0200021	-0.323712	-0.523751	-3.44476	-3.46897	-3.5471	-3.30143	-3.88547	-4.50957	0.319328	-0.600921	0.451886	0.47968	1.07974	0.0200021	0.562068	0.657315	-0.0867703	0.678494	0.16942	0.969051	-4.23464
Na_454_39731	0.212913	0.793417	0.840296	1.19455	0.148703	0.782003	0.123511	-0.307563	0.10009	0.279261	0.287063	-1.05008	-2.22941	-1.81434	-0.560851	-2.27335	-1.65145	-0.607882	0.888373	1.42043	0.870081	-0.338395	1.05744	-0.814626	0.138577	1.22849	0.0263076	-0.745392	-1.89217	-1.51013	-1.08416	-1.67415	-1.005	-2.39991	-2.32683	-2.02245	0.291584	0.474389	-0.437022	0.570523	0.139559	-1.26168	-1.05756	-0.735828	0.272088	-0.992626	-0.465467	-0.63552	-1.0102
Na_454_40855	0.277828	0.0285082	-0.492242	0.443798	1.84597	1.09494	-0.0603251	0.274225	0.931966	1.26858	0.00118637	-0.44964	-1.38682	-1.03471	-0.445832	-0.690066	-0.147445	-1.23363	1.01995	0.841785	1.02439	1.19738	-0.623595	-1.19678	2.30717	1.8382	2.19871	0.764314	-1.37243	-0.701847	-1.80024	-1.22718	-1.85558	-1.05805	-0.696676	-0.510142	2.50393	0.360341	0.433464	0.557173	0.849332	0.288819	1.56451	0.0139503	0.94774	-0.474576	1.00748	0.757485	-0.226565
Na_454_04103	4.40272	4.04521	4.4847	3.30908	3.49108	3.66409	4.09994	4.32524	4.33006	3.09902	3.10319	3.32416	-1.17726	-1.21506	-1.5084	-0.868121	-1.96065	-2.72122	5.64491	5.52263	5.23815	4.88193	4.8321	4.84703	5.73412	5.58185	5.1407	2.84901	2.48916	2.90605	-1.47858	-0.742979	-1.86855	-2.57247	-4.38701	-1.64117	2.74478	2.79638	2.58466	2.88003	2.94751	2.52384	2.74435	2.35217	2.53132	3.08643	3.27944	3.14816	-2.07528
Na_454_05017	0.97672	0.508043	0.266904	0.572062	0.916695	0.579167	1.24372	1.21242	1.28306	-0.127142	-0.507	-0.0651474	0.163018	-0.0845618	-0.144578	0.143132	-0.00468969	-0.681551	1.41831	1.25315	1.41847	1.93768	2.00927	1.87222	1.71304	1.9585	1.91998	1.15195	0.995059	0.933126	-0.0113235	0.188789	-0.12065	0.135301	-0.146318	-0.00198126	0.55037	0.998825	1.06096	1.44185	1.47469	1.46191	0.982625	1.17051	1.26625	1.29423	1.08449	0.972129	-0.342293
Na_454_06723	1.8635	1.83449	2.2548	2.08459	2.0225	2.21242	1.2423	1.09048	1.87171	-0.139734	-0.41201	0.0924423	0.792644	0.753847	0.61392	0.881126	0.519028	0.338554	1.81743	1.20728	2.08612	2.55813	2.27799	2.88485	1.10622	1.03296	1.85143	-0.851159	-1.04221	-0.654692	0.55557	0.762403	1.0601	1.6317	1.09183	1.24085	-0.33852	-0.0645816	-0.461996	0.458243	-0.29807	0.583765	-1.09979	-1.38886	-1.16331	-1.38007	-1.66102	-1.48386	0.34287
Na_454_02400	-1.27436	-1.24624	-1.02096	0.651676	-1.06482	-0.693968	-1.19814	-0.832453	-0.752489	4.65135	5.26021	5.12053	0.252928	0.623852	0.513049	0.192843	0.820527	0.834677	-1.84825	-1.99988	-0.990483	0.981347	1.01303	1.43752	-1.65297	-2.15334	-1.11008	-0.430978	-0.538758	-0.577853	0.802957	0.751035	0.970385	1.12265	0.910232	0.663657	-1.61463	-0.845326	-0.600334	-1.01751	-1.01374	-0.683944	-1.87416	-1.73448	-0.954532	-0.847714	-1.06169	-1.21668	0.401698
Na_454_09000	-0.965828	-1.12453	-1.23924	-0.702161	-0.379468	-0.293291	-1.07461	-0.853887	-0.683735	4.45274	4.20997	3.98687	0.208304	0.268874	0.112983	0.00424886	0.470331	0.476733	-0.793721	-0.739419	-1.29755	-0.917103	-1.27219	-1.15749	-0.931102	-1.04307	-1.88502	2.00617	1.49126	1.46612	0.0568674	0.159896	0.0965097	-0.322023	0.217608	0.125242	-0.697595	-0.347378	-1.06768	-0.504378	-0.931677	-0.570377	-0.566321	-0.783734	-0.936161	-0.334086	-0.0960195	-0.228555	-0.00933576
Na_454_00178	-2.65938	-2.81006	-2.82948	-1.86164	-2.74901	-1.67006	-5.43175	-2.61552	-2.96859	2.28151	1.97596	1.4983	0.0600796	0.0100355	-0.0100355	-0.0170946	0.332622	0.423148	-3.92613	-3.90057	-0.615244	1.59144	0.939007	0.987629	-3.53675	-3.87391	-1.80391	-0.306705	-0.895114	-0.681057	0.340909	0.279237	0.621861	1.31051	0.667679	0.260334	-3.38588	-1.94255	-2.16194	-1.54532	-0.923685	-0.755937	-3.54662	-3.31994	-2.99473	-1.13831	-0.75887	-1.2305	-0.144584
Na_454_00083	-2.3477	-2.58168	-2.88793	-1.6327	-2.26581	-1.49324	-2.54302	-2.50463	-2.73632	1.76014	0.879298	0.40124	0.587641	0.364186	0.103014	1.05378	0.623624	0.238848	-4.43738	-3.91524	-1.4842	0.499723	-0.28719	-0.176656	-3.66245	-3.83391	-2.57652	-1.22489	-2.36723	-2.24457	0.533171	0.444768	0.666138	1.22083	1.3011	0.885327	-2.92718	-1.96976	-1.90878	-1.36458	-1.03914	-0.894621	-3.04141	-2.51033	-1.90522	-1.84722	-1.85867	-2.19266	0.626926
Na_454_00021	-1.47825	-1.89805	-2.4173	-1.65733	-2.28497	-1.64824	-1.608	-1.82458	-1.92503	1.57407	1.33433	0.662933	0.147948	0.00211525	-0.0093441	0.361769	0.240882	0.134562	-4.56117	-4.10228	-0.292376	1.28997	0.76043	0.758875	-4.17003	-3.75942	-1.11599	-0.0453177	-1.1714	-0.959545	0.0916481	0.0498714	0.293383	0.692853	0.690186	0.270808	-3.494	-1.92374	-1.09307	-0.249406	0.174212	0.0849252	-3.70678	-3.44079	-1.78024	-0.52019	-0.104214	-1.19779	-0.570071
Na_454_00101	-1.92663	-2.05538	-2.26768	-2.18446	-2.37661	-2.21618	-2.51158	-2.6188	-2.35411	0.404766	0.112772	-1.46527	1.03024	1.20904	0.922817	1.0734	1.15886	1.17225	-2.95859	-3.0445	-0.953599	0.721566	0.353847	0.673451	-3.23768	-3.30905	-2.27891	0.159415	-0.329664	-0.278026	0.932836	0.973336	1.3213	1.57164	1.44482	1.26464	-2.64595	-1.84474	-1.99282	-1.43066	-0.719972	-0.888482	-3.08898	-2.8826	-2.39591	-1.23584	-0.697703	-1.23854	0.921563
Na_454_00269	-2.51428	-2.51991	-2.67543	-2.60883	-2.937	-2.46946	-4.74573	-3.18798	-2.82579	1.17076	0.191679	-1.89742	0.873905	0.837132	0.541795	1.04406	0.923744	0.962796	-3.59145	-3.71067	-1.23675	1.51989	0.158602	0.44155	-3.97322	-3.92409	-2.76692	0.301736	-1.03031	-0.813385	0.616455	0.62175	1.15778	1.51992	1.30493	0.997474	-3.42273	-2.52748	-2.64423	-1.74277	-1.12697	-0.952369	-3.86417	-3.65734	-3.22109	-1.46686	-0.946719	-1.69399	0.196546
Na_454_00315	0.830404	0.634048	0.277387	0.475119	0.776926	0.441287	0.592233	0.281056	0.360499	0.855882	0.752981	0.238047	-1.30943	-1.333	-1.33831	-1.27525	-1.32656	-1.2647	-0.842797	-0.55945	-0.226106	1.82845	1.18568	0.713861	-0.514396	-0.331572	-0.3413	0.503618	0.0882702	0.0744839	-1.29917	-1.50637	-1.0972	-0.616694	-1.17259	-1.00367	-1.63443	-0.850399	-0.79475	0.887564	1.15915	1.17916	-1.05534	-0.839423	-0.410933	0.386849	0.0302525	0.299584	-1.14496
Na_454_00797	0.537495	0.556005	0.113367	1.03461	1.40532	1.14612	0.760971	0.987903	0.452646	0.378715	-0.674251	-0.402419	-1.69172	-1.67755	-1.80031	-1.48166	-1.91219	-1.81348	0.104613	0.126638	-0.250346	0.494145	0.234179	0.134688	0.605416	0.305362	0.223816	0.457861	0.160138	0.28575	-2.10369	-2.16164	-1.86472	-1.61409	-1.78369	-1.68254	-0.371342	-0.299963	-0.780911	-0.00437403	-0.143813	-0.201621	-0.136716	-0.221102	-0.844452	0.122032	-0.336392	-0.166775	-1.85136
Na_454_36134	0.171572	0.000551701	0.249788	-0.0706787	-0.0137858	-0.131712	-0.52621	-0.205221	0.0780811	0.450471	0.729806	-0.257648	-0.727197	-0.589711	-0.595341	-1.1158	-0.848844	-0.511424	-1.01277	-0.961361	1.4307	3.4233	2.73796	2.40518	-1.09387	-1.28329	0.123324	1.15052	1.09534	0.624342	-0.392301	-0.898537	0.444667	1.36472	0.267972	0.36608	-0.689942	0.314197	-0.193709	-0.000551224	0.673089	0.89469	-0.758718	-1.11609	-0.605757	-0.220372	0.0733843	-0.612184	0.0781498
Na_454_07429	-4.00475	-3.26436	-2.91023	-3.80447	-4.41349	-0.741792	-3.47025	-4.14956	-2.39691	2.26893	2.00224	0.741792	3.58316	3.97536	4.11974	3.62057	3.6542	4.21496	-5.16336	-6.2445	-5.3015	-4.00605	-5.51938	-6.17951	-5.37985	-5.57759	-5.98924	2.29981	1.63178	1.71958	4.15481	3.79454	3.94529	4.06926	4.6598	4.46844	-5.15252	-4.80714	-5.59021	-4.66107	-4.69957	-4.42453	-4.76575	-5.10723	-5.46943	0.76122	1.45488	0.876689	4.3015
Na_454_00565	0.405725	0.222128	0.0781987	0.723318	0.472064	0.274227	0.35805	0.349849	0.454396	2.72924	2.93585	2.84472	-1.15199	-0.991092	-1.19327	-0.886723	-1.00082	-1.39845	0.239192	-0.313462	0.859663	1.8929	1.93633	1.81714	-0.171435	-0.107241	0.940516	2.12227	1.91939	1.83883	-0.621413	-0.640077	-0.406214	0.0415328	-0.352055	-0.413593	0.0588353	0.665945	1.29844	1.07591	0.909262	1.12739	0.242963	0.224951	1.24058	0.501216	0.641403	0.616284	-0.969556
Na_454_04958	-0.178481	-0.145644	-0.159482	-0.263505	-0.0849724	-0.790322	0.0952415	0.318693	0.113589	0.415955	-0.748031	-0.571267	-0.103779	-0.417088	-0.410349	-0.087759	-0.407627	-0.711193	-0.568246	-0.116251	-0.253279	0.336547	-0.342604	-0.659548	0.492927	0.504271	0.09412	0.249538	-0.680478	-0.0484366	0.0742474	-0.60549	0.199242	0.0431929	-0.763182	-0.59956	-0.091629	-0.333563	-0.21733	0.166144	-0.100193	-0.355836	0.102311	0.076292	0.291729	0.674807	0.715417	0.601889	-0.76266
Na_454_02978	-1.33065	-1.52057	-1.41427	2.25448	-0.0488358	-0.207905	-0.740903	-0.99135	-0.950328	5.97862	6.12952	6.20116	0.0945711	-0.239108	-0.278799	0.138809	0.467967	-0.18362	0.819778	-1.53104	0.489229	2.41388	2.31341	2.46202	0.0274749	-0.97754	0.379974	1.47208	0.716738	0.994469	1.33074	0.962301	1.13291	1.53865	1.1578	0.802485	-1.88795	-0.709617	2.58507	0.497032	0.435623	1.02041	-1.8317	-1.62851	2.56617	0.506853	0.349746	0.385372	-0.0453949
Na_454_13225	-0.0729775	-0.390074	-0.81813	3.71463	0.709775	-0.392615	-0.353084	0.0539017	0.366953	8.08016	8.93024	8.50785	-1.77132	-1.29548	-1.03468	-0.258953	0.118278	0.214946	1.40128	-1.30894	0.748499	2.05955	2.34089	1.86298	1.79993	-0.628425	0.54507	3.08006	3.34829	3.1511	2.69263	1.4942	1.25016	1.68409	-1.01149	-0.705705	-0.154622	0.103675	3.97214	0.303335	0.266673	0.0871968	0.230817	0.608826	4.66583	1.12397	1.06356	-0.302912	-0.413033
Na_454_14633	1.41418	1.55665	0.430187	3.53377	2.6248	2.03097	2.29689	2.04556	1.26284	5.97445	5.54503	5.33296	-4.03138	-3.54395	-3.13777	-3.12252	-4.05809	-3.81417	2.3831	0.096174	2.05046	3.52022	3.66772	3.76451	2.09166	1.18454	3.39823	4.0867	3.98777	3.97635	-4.32911	-4.31189	-4.4482	-3.58569	-3.24163	-2.96922	-1.74609	-0.160644	2.96141	1.68992	2.21223	2.05602	-0.56061	0.451902	3.46065	2.12393	2.31108	1.71557	-2.62149
Na_454_19886	-0.171402	-0.314376	-0.625421	1.93363	0.626864	-1.00414	0.237193	0.117266	-0.237871	4.06664	4.38107	4.10588	-2.21811	-2.32836	-2.43696	-1.49155	-0.874867	-1.84189	1.33394	-0.257418	0.607176	2.31364	1.96924	1.77699	1.04226	0.389972	1.72562	1.72407	1.69678	1.5616	-0.272625	-0.205231	-0.495036	0.632273	-0.962805	-1.00269	-0.646028	0.0537968	2.31318	0.400313	0.641014	0.534278	-0.00984383	0.194579	2.42052	0.986647	0.95218	1.02417	-2.12438
Na_454_41896	-0.293053	-0.226758	-0.406881	-0.00973988	0.054697	-0.430289	-0.265815	-0.271861	-1.11677	0.129332	0.130005	-0.600165	0.0354528	-0.0363059	-0.42904	-0.207876	-0.188874	-0.268737	0.430459	0.554523	1.20853	1.4408	1.76302	1.89441	0.499638	0.684857	1.7894	1.46036	1.44682	1.48221	-0.101287	0.183029	-0.0556874	-0.0891638	-0.296836	0.0289431	0.0593619	1.23041	0.271388	0.221524	0.0686736	-0.0889435	0.308182	-0.311399	0.354097	0.912936	0.937686	1.06184	-0.0711446
[truncated: 59 more columns]
